# 1 **Single cell chromatin accessibility reveals pancreatic islet cell type-** 2 **and state-specific regulatory programs of diabetes risk**

3 Joshua Chiou<sup>\*,1</sup>, Chun Zeng<sup>\*,2,3</sup>, Zhang Cheng<sup>4</sup>, Jee Yun Han<sup>4</sup>, Michael Schlichting<sup>2,3</sup>, Serina  
4 Huang<sup>2</sup>, Jinzhao Wang<sup>2,3</sup>, Yinghui Sui<sup>2,3</sup>, Allison Deogaygay<sup>2</sup>, Mei-Lin Okino<sup>2</sup>, Yunjiang Qiu<sup>3</sup>,  
5 Ying Sun<sup>2</sup>, Parul Kudtarkar<sup>2</sup>, Rongxin Fang<sup>3</sup>, Sebastian Preissl<sup>4</sup>, Maike Sander<sup>\*\*,#,2,3,5</sup>, David  
6 Gorkin<sup>\*\*,#,4</sup>, Kyle J Gaulton<sup>\*\*,#,2,5</sup>

7

- 8 1. Biomedical Graduate Studies Program, University of California San Diego, La Jolla CA
- 9 2. Department of Pediatrics, Pediatric Diabetes Research Center, University of California San  
10 Diego, La Jolla CA
- 11 3. Department of Cellular and Molecular Medicine, University of California San Diego, La Jolla  
12 CA
- 13 4. Center for Epigenomics, University of California San Diego, La Jolla CA
- 14 5. Institute for Genomic Medicine, University of California San Diego, La Jolla CA

15

16 \* Authors contributed equally to this work

17 \*\* Authors jointly supervised this work

18

19 # Corresponding author:

20

21 Kyle Gaulton

22 9500 Gilman Drive, #0746

23 Department of Pediatrics

24 University of California San Diego

25 858-822-3640

26 kgaulton@ucsd.edu

27

28 David Gorkin

29 9500 Gilman Drive, #0767

30 Center for Epigenomics

31 University of California San Diego

32 858-534-7581

33 dgorkin@ucsd.edu

34

35 Maike Sander

36 9500 Gilman Drive, #0695

37 Pediatric Diabetes Research Center

38 Departments of Pediatrics & Cellular and Molecular Medicine

39 University of California San Diego

40 858-246-0843

41 masander@ucsd.edu

42 **Abstract**

43

44 Genetic risk variants for complex, multifactorial diseases are enriched in *cis*-regulatory elements.  
45 Single cell epigenomic technologies create new opportunities to dissect cell type-specific  
46 mechanisms of risk variants, yet this approach has not been widely applied to disease-relevant  
47 tissues. Given the central role of pancreatic islets in type 2 diabetes (T2D) pathophysiology, we  
48 generated accessible chromatin profiles from 14.2k islet cells and identified 13 cell clusters  
49 including multiple alpha, beta and delta cell clusters which represented hormone-producing and  
50 signal-responsive cell states. We cataloged 244,236 islet cell type accessible chromatin sites and  
51 identified transcription factors (TFs) underlying both lineage- and state-specific regulation. We  
52 measured the enrichment of T2D and glycemic trait GWAS for the accessible chromatin profiles  
53 of single cells, which revealed heterogeneity in the effects of beta cell states and TFs on fasting  
54 glucose and T2D risk. We further used machine learning to predict the cell type-specific regulatory  
55 function of genetic variants, and single cell co-accessibility to link distal sites to putative cell type-  
56 specific target genes. We localized 239 fine-mapped T2D risk signals to islet accessible  
57 chromatin, and further prioritized variants at these signals with predicted regulatory function and  
58 co-accessibility with target genes. At the *KCNQ1* locus, the causal T2D variant rs231361 had  
59 predicted effects on an enhancer with beta cell-specific, long-range co-accessibility to the insulin  
60 promoter, and deletion of this enhancer reduced insulin gene and protein expression in human  
61 embryonic stem cell-derived beta cells. Our findings provide a cell type- and state-resolved map  
62 of gene regulation in human islets, illuminate likely mechanisms of T2D risk at hundreds of loci,  
63 and demonstrate the power of single cell epigenomics for interpreting complex disease genetics.

64

65

66

67

68

69

70

71

## 72 Introduction

73

74 Gene regulatory programs are largely orchestrated by *cis*-regulatory elements that direct the  
75 expression of genes in response to specific developmental and environmental cues. Genetic  
76 variants associated with disease by genome-wide association studies (GWAS) are highly  
77 enriched within putative *cis*-regulatory elements<sup>1</sup>, highlighting the importance of regulatory  
78 sequence in mediating disease risk. The activity of regulatory elements is often restricted to  
79 specific cell types and/or cell states, limiting the ability of ATAC-seq and other “ensemble” (or  
80 “bulk”) epigenomic technologies to map regulatory elements in individual cell types within disease-  
81 relevant tissues. To overcome this limitation, new approaches to obtain ATAC-seq profiles from  
82 single nuclei (snATAC-seq) allow for the disaggregation of open chromatin from heterogenous  
83 samples into component cell types and subtypes<sup>2-5</sup>. These developments create opportunities to  
84 dissect the molecular mechanisms that underlie genetic risk of disease. However, to date  
85 snATAC-seq data from disease-relevant human tissues are limited<sup>6-9</sup>.

86 Type 2 diabetes (T2D) is a multifactorial disease with a highly polygenic inheritance<sup>10</sup>. Pancreatic  
87 islets are central to genetic risk of T2D, as evidenced by shared association between T2D risk  
88 and quantitative measures of islet function<sup>11-13</sup> and enrichment of T2D risk variants in islet  
89 regulatory sites<sup>14-18</sup>. Islets are comprised of multiple endocrine cell types with distinct functions<sup>19-  
90 21</sup> and are heterogeneous<sup>22-24</sup> in gene expression and other molecular signatures which likely  
91 reflect different functional cell states<sup>22,25,26</sup>. Heterogeneity in the epigenome of islet cell types has  
92 not been described, however, which is necessary to understand islet regulation and interpret the  
93 molecular mechanisms of non-coding T2D risk variants. In this study, we map accessible  
94 chromatin profiles of individual islet cells using snATAC-seq, define the regulatory programs of  
95 islet cell types and cell states, describe their relationship to T2D risk and fasting glycemia, and  
96 predict the molecular mechanisms of T2D risk variants.

97

## 98 Results

99

### 100 Islet snATAC-seq reveals 13 cell clusters with distinct regulatory landscapes

101 To map the accessible chromatin landscape of single islet cells, we performed snATAC-seq on  
102 human pancreatic islets from three donors (Supplementary Table 1). We used a combinatorial  
103 barcoding snATAC-seq approach previously optimized by our group for use on tissues<sup>2,4</sup> (see  
104 Methods). To confirm library quality, we first analyzed the data as ensemble ATAC-seq by

105 aggregating all high-quality mapped reads irrespective of barcode. Ensemble snATAC-seq from  
106 all three samples showed the expected insert size distribution (Supplementary Figure 1a), strong  
107 enrichment of signal at transcription start sites (TSS) (Supplementary Figure 1b), and high  
108 concordance of signal with published islet ATAC-seq data<sup>14,27–29</sup> (Supplementary Figure 1c).

109 To obtain a collection of high-quality single cell profiles, we first filtered out cells with less than  
110 1,000 reads (Supplementary Figure 1d), resulting in a total of 17,995 cells across the three  
111 samples. We then clustered accessible chromatin profiles from these cells, making key  
112 modifications to previous approaches (see Methods for details)<sup>4</sup>. First, as the inputs to clustering  
113 we used normalized read counts in 5 kb sliding windows genome-wide rather than read counts  
114 within ensemble peak calls, reasoning that ensemble peak calls could be biased towards more  
115 common cell types. Second, we performed an initial round of clustering and quality control on a  
116 per-sample basis, which removed 2,709 cells in low read depth clusters. Third, prior to clustering  
117 cells across samples, we used mutual nearest neighbors<sup>30</sup> to correct for variability across donors.  
118 Finally, we clustered all cells together and performed additional quality control by removing one  
119 cluster without representation from all donors (694 cells), and one with aberrant read depth and  
120 low intra-cluster similarity (192 cells). After all clustering and filtering steps, we retained 14,239  
121 cells which mapped to 13 clusters, all of which had consistent representation across samples and  
122 read depth profiles (Figure 1a, Supplementary Figure 2a-c).

123 To determine the cell type represented by each cluster, we examined chromatin accessibility at  
124 the promoter region of the cognate hormone genes for endocrine cells and known marker genes  
125 for non-endocrine cell types. Based on these marker gene promoters, we identified clusters  
126 representing beta (*INS-IGF2*/insulin), alpha (*GCG*/glucagon), delta (*SST*/somatostatin), gamma  
127 (*PPY*/pancreatic polypeptide) cells, exocrine acinar and ductal (labeled as ‘exocrine’; *REG1A*,  
128 *S100A14*)<sup>31,32</sup>, immune (*PTPN22*)<sup>32</sup>, stellate (*PDGFRB*)<sup>32</sup>, glial (*CDH19*)<sup>33</sup>, and endothelial  
129 (*CD93*)<sup>34</sup> cells (Figure 1b-c, Supplementary Figure 2d). We defined a broader set of marker gene  
130 promoters for each cluster by identifying gene promoters with differential accessibility across  
131 clusters and retaining the top 100 differential promoters for each cluster (see Methods,  
132 Supplementary Table 2). To validate the cell type we assigned to each cluster, we derived gene  
133 expression marker genes from published islet scRNA-seq data<sup>23</sup> and correlated t-statistics of  
134 snATAC-seq marker gene promoters with t-statistics of scRNA-seq marker genes (see Methods,  
135 Supplementary Figure 3a-e). We observed highly specific correlations between marker genes of  
136 endocrine and other pancreatic cell types in snATAC-seq and scRNA-seq (Figure 1d). Of note,



137 the multiple clusters of alpha, beta, and delta cells in snATAC-seq each had strongest correlation  
138 with their respective cell type.

139 To characterize the regulatory programs of each cell type, we aggregated reads for cells within  
140 each cluster and identified accessible chromatin sites for the cluster using MACS2 (see Methods).  
141 In total we identified 244,236 accessible chromatin sites merged across the 13 clusters  
142 (Supplementary Data 1), which were concordant with sites identified in ensemble islets  
143 (Supplementary Figure 4a-b). Notably, accessible chromatin in alpha and beta cells was highly  
144 concordant with bulk ATAC-seq of corresponding FACS-sorted populations<sup>35,36</sup>, confirming that  
145 we identified cell type-specific islet chromatin (Supplementary Figure 4c). To next understand the  
146 regulatory logic underlying islet cell types, we used chromVAR<sup>37</sup> to identify TF sequence motifs  
147 from JASPAR<sup>38</sup> enriched within accessible chromatin of each cell. We focused on 111 TF motifs  
148 with evidence for variability across cells (see Methods, Supplementary Figure 4d, Supplementary  
149 Table 3). Analysis of motif enrichments averaged across cells for each cell type revealed distinct  
150 patterns of motif enrichment across cell types, many consistent with known functions in islet cells  
151 (Figure 1e, Supplementary Table 3). For example, the PDX1 motif was enriched in beta  
152 (normalized enrichment=0.93) and delta (1.0) cells<sup>39</sup>, and MAF motifs were enriched in alpha (1.0)  
153 and beta cells (0.93)<sup>40-42</sup> (Figure 1e). We also identified motif enrichments shared across all  
154 endocrine cell types, such as FOXA, and in non-endocrine cell types, including IRF for immune<sup>43</sup>  
155 (1.0) and ETS for endothelial<sup>44</sup> (1.0) cells (Figure 1e). Hierarchical clustering of cell types based  
156 on TF motif enrichment patterns further revealed that regulatory programs of beta and delta cells  
157 were closely related as were the programs of alpha and gamma cells (Figure 1e), consistent with  
158 single cell expression data<sup>31,32,45</sup>.

159

## 160 **Heterogeneity in islet endocrine cell accessible chromatin and regulatory programs**

161 A major strength of single cell approaches is the ability to reveal heterogeneity within a cell type.  
162 Indeed, our initial clustering showed that alpha, beta and delta cells segregated into sub-clusters.  
163 To characterize these sub-clusters, we determined gene promoter accessibility in each sub-  
164 cluster and identified promoters with variable accessibility between sub-clusters (see Methods,  
165 Supplementary Data 2). We focused on alpha and beta cells, where cell numbers allowed for  
166 robust calculations. Notably, we found *INS* among genes with the most variable promoter  
167 accessibility between beta cell sub-clusters (*INS-IGF2* beta OR=5.05, two-sided Fisher's exact  
168  $P=3.98 \times 10^{-37}$ ), leading us to rename the beta 1 and beta 2 clusters as  $INS^{\text{high}}$  and  $INS^{\text{low}}$  beta  
169 cells, respectively (Figure 1b-c; Figure 2a). Similarly, *GCG* promoter accessibility was highly

170 variable between alpha cell sub-clusters ( $GCG$  alpha OR=3.30,  $P=4.68 \times 10^{-25}$ ), and we renamed  
171 the alpha 1 and alpha 2 sub-clusters as  $GCG^{\text{high}}$  and  $GCG^{\text{low}}$  alpha cells, respectively (Figure 1b-  
172 c; Figure 2a).

173 Apart from *INS* and *GCG*, we found significant overlap in the genes that distinguish hormone-high  
174 ( $INS^{\text{high}}$ ,  $GCG^{\text{high}}$ ) from hormone-low ( $INS^{\text{low}}$ ,  $GCG^{\text{low}}$ ) alpha and beta cells by gene set enrichment  
175 analysis (GSEA) (Figure 2b). Genes with increased promoter accessibility in hormone-high states  
176 including *GCK*, *ABCC8*, *G6PC2* and *SLC30A8* were enriched for processes such as hormone  
177 secretion and glucose response (Figure 2a,c, Supplementary Table 4). In contrast, genes with  
178 increased promoter accessibility for hormone-low states including *ATF3*, *FOSL1*, and *FOSL2* and  
179 were enriched for stress-induced signaling response<sup>46</sup> (Figure 2a,c, Supplementary Table 4).  
180 Similar states were also evident in delta cells, although low cell numbers impede deeper analysis  
181 in our study (Supplementary Figure 5). We compared genes with significantly different promoter  
182 accessibility between states to gene sets describing beta cell heterogeneity ( $\beta$ -sub.1-4) from a  
183 previous scRNA-seq study<sup>23</sup>. Genes with increased promoter accessibility in hormone-low cells  
184 ( $INS^{\text{low}}$ ,  $GCG^{\text{low}}$ ) were enriched in a beta cell sub-cluster ( $\beta$ -sub.4) associated with ER stress and  
185 protein folding and with low *INS* expression, whereas genes with increased promoter accessibility  
186 in hormone-high cells ( $INS^{\text{high}}$ ,  $GCG^{\text{high}}$ ) were enriched in the other beta cell sub-clusters ( $\beta$ -sub.1-  
187 3) (Figure 2b). These data reveal epigenomic differences between endocrine cell states among  
188 genes involved in hormone production and stress-induced signaling responses, and point to an  
189 underlying commonality in the genes that govern state-specific functions across different  
190 endocrine cell types.

191 The transcriptional regulatory programs driving functional heterogeneity in alpha and beta cells  
192 are unknown. Therefore, we determined TF sequence motifs differentially enriched across alpha  
193 and beta cell states. We focused on 111 TF motifs showing evidence for variable enrichment  
194 between alpha and beta cell states (see Methods, Supplementary Figure 6a, Supplementary  
195 Table 5) and observed clear patterns that distinguished different states within alpha and beta  
196 cells, again revealing commonalities across cell types (Figure 2d). For example, motifs for RFX  
197 family members were enriched in hormone-high states ( $GCG^{\text{high}}$ ,  $INS^{\text{high}}$ ), but not in hormone-low  
198 states ( $GCG^{\text{low}}$ ,  $INS^{\text{low}}$ ) (RFX3 - mean  $INS^{\text{high}}$  enrich=.26,  $INS^{\text{low}}$ =-.62,  $P=3.5 \times 10^{-158}$ ;  $GCG^{\text{high}}$ =.29,  
199  $GCG^{\text{low}}$ =-.56,  $P=7.3 \times 10^{-91}$ ) (Figure 2d). In contrast, motifs for FOS and JUN family members were  
200 prominently enriched in hormone-low states, but not the hormone-high states (FOS::JUN - mean  
201  $INS^{\text{high}}$  enrich=-1.45,  $INS^{\text{low}}$ =4.50,  $P=4.7 \times 10^{-307}$ ;  $GCG^{\text{high}}$ =-1.45,  $GCG^{\text{low}}$ =4.46,  $P=2.3 \times 10^{-292}$ )

202 (Figure 2d). Again, we also observed similar motif enrichment patterns between delta cell states  
203 (Supplementary Figure 6a-b).

204 Analysis of single cells ordered along a trajectory has been used to examine gene regulatory  
205 programs as a continuum rather than as discrete or binary states<sup>6,23,47</sup>. To explore potential  
206 gradations among alpha and beta cells, we used Cicero<sup>6</sup> to order alpha and beta cells along  
207 trajectories based on chromatin accessibility. We ordered cells using high promoter accessibility  
208 at *INS* (beta) or *GCG* (alpha) as the root states for each trajectory (see Methods). We refer to the  
209 axis of these trajectories as “pseudo-state” rather than the conventional “pseudo-time”, because  
210 the heterogeneity appears to be more related to cell state than to time. We observed cells on a  
211 gradient between hormone-high and hormone-low states of alpha and beta cells, and we noted a  
212 discernable transition point within the trajectory (Figure 2e, Supplementary Figure 7a-b). These  
213 trajectories allowed us to examine gene promoter accessibility and TF motif enrichment as a  
214 function of pseudo-state (Figure 2e, Supplementary Figure 7c). Consistent with the above results,  
215 lineage-specifying genes and enrichments for motifs in TF families such as RFX, Neurogenin-  
216 ATO and NFAT decreased along the trajectory from hormone-high to -low cells, whereas  
217 enrichment for motifs in TF families such as FOS/JUN, XBP and CCAAT (NFYA) increased along  
218 the trajectory (Figure 2e).

219 Structurally-related TFs often have similar motifs, and thus to assign motifs to specific TFs we  
220 correlated promoter-accessibility of TFs within the structural subfamily with motif enrichments  
221 across the state trajectory (see Methods)<sup>48</sup>. Motif enrichment for the FOS/JUN family correlated  
222 with the promoter accessibility of *FOSL1*, *FOSL2* and *JUND* across cells (Figure 2f), supporting  
223 a role for these specific TFs in hormone-low cell regulation. Similarly, motif enrichment for the  
224 Neurogenin-ATO subfamily correlated with promoter accessibility of *NEUROD1*, supporting a role  
225 for this TF in hormone-high cell regulation (Supplementary Figure 8a). While we did not observe  
226 strong correlations between RFX motif enrichment and promoter accessibility of *RFX* genes, the  
227 overall high promoter accessibility of *RFX6* and *RFX3* and known function in endocrine cells<sup>49–51</sup>  
228 suggests they are TFs likely involved in hormone-high cell regulation (Supplementary Figure 8b).

229

### 230 **Enrichment of islet cell type- and state-specific regulatory sequences for diabetes- and** 231 **fasting glycemia-associated genetic variants**

232 Variants associated with complex diseases and physiological traits are enriched within *cis*-  
233 regulatory sequences<sup>1,52</sup>. More specifically, genetic variants influencing diabetes and fasting

234 glucose level are enriched in pancreatic islet regulatory elements<sup>15–17,53</sup>. However, these  
235 enrichments based on ensemble data obscure the potential role of islet cell type- and state-  
236 specific regulation in these traits. Using our islet cell type- and state-resolved accessible  
237 chromatin profiles, we sought to determine the enrichment of genetic variants associated with  
238 type 1 and 2 diabetes<sup>10,54</sup> and diabetes-related quantitative phenotypes<sup>13,55–59</sup> as well as other  
239 complex traits and disease for calibration<sup>60–67</sup>. We first determined the enrichment of variants in  
240 accessible chromatin sites for each islet cell type and state using stratified LD score regression<sup>68,69</sup>  
241 (see Methods). We observed significant enrichment (FDR<.1) of fasting glucose (FG) level and  
242 T2D association for both  $INS^{high}$  and  $INS^{low}$  beta cell states (T2D  $INS^{high}$  Z=4.45 q-value=.001,  
243  $INS^{low}$  Z=4.00 q=.004; FG  $INS^{high}$  Z=3.93 q=.004,  $INS^{low}$  Z=3.34 q=.027), as well as enrichment of  
244 body-mass index (BMI) for  $SST^{high}$  delta cells (Z=3.50 q=.027) (Figure 3a). We also observed  
245 suggestive enrichment (P<.01) of 2hr glucose level adjusted for BMI for both alpha cell states  
246 ( $GCG^{high}$  Z=2.45 P=.007,  $GCG^{low}$  Z=2.40 P=.008), and T2D and fasting proinsulin level for  $GCG^{low}$   
247 alpha cells (PI: Z=2.64, P=.004; T2D: Z=2.40 P=.008), although these enrichments did not pass  
248 multiple test correction.

249 In these analyses, we again noted evidence for differences in enrichments between the hormone-  
250 high and -low states of endocrine cells (Figure 3a). To further resolve the heterogeneity of genetic  
251 association enrichment patterns, we used a novel framework to test the enrichment of genetic  
252 association signal genome-wide within accessible chromatin profiles of single cells (see  
253 Methods). We applied this approach to genetic association data for T2D and fasting glucose level,  
254 as well as negative control traits major depressive disorder and systemic lupus erythematosus  
255 (Figure 3b). We observed marked heterogeneity among beta cells in enrichment estimates for  
256 fasting glucose-associated variants, whereby cells in the  $INS^{high}$  state had significantly stronger  
257 enrichment than cells in the  $INS^{low}$  state ( $INS^{high}$  median Z=2.42,  $INS^{low}$  median Z=1.13,  $P<2.2\times 10^{-16}$ )  
258 (Figure 3b). We further examined heterogeneity by calculating the average enrichment  
259 estimates for cells binned across the ‘pseudo-state’ trajectory (see Figure 2), which revealed a  
260 clear pattern of decreasing enrichment for fasting glucose-associated variation across pseudo-  
261 state moving from  $INS^{high}$  to  $INS^{low}$  beta cells (Figure 3b). Conversely, for T2D we observed  
262 enrichment for beta cells that was more consistent across  $INS^{high}$  and  $INS^{low}$  beta cells, as well as  
263 across the pseudo-state trajectory ( $INS^{high}$  median Z=0.48,  $INS^{low}$  median Z=0.51, P=0.84) (Figure  
264 3b). In comparison, major depressive disorder and lupus showed no evidence for enrichment for  
265 beta cells (all median Z<.001) (Figure 3b). Knowledge of state-specific effects of cell types on  
266 specific phenotypes can then inform interpretation of association signals for those phenotypes;  
267 for example, at the *DGKB* locus, variants associated with both fasting glucose level and T2D

268 overlapped a chromatin site with higher activity in  $INS^{high}$  beta cells, implicating this state-  
269 dependent regulatory sequence in mediating the association signal (Figure 3c).

270 Given our ability to map both complex trait and TF motif enrichments to single cells, we reasoned  
271 that joint analysis of these data could provide insights into TFs and regulatory networks through  
272 which genetic effects on these traits are mediated. We correlated single cell fasting glucose level  
273 and T2D enrichment z-scores with single cell TF motif enrichments from chromVAR<sup>37</sup>, both across  
274 all 14.2k islet cells as well as just the 7.2k beta cells (see Methods). Across all 14.2k cells, we  
275 observed strong positive correlation between fasting glucose level and T2D enrichment and beta  
276 cell lineage-specifying TF motifs (e.g. PDX1), and negative correlation with TF motifs regulating  
277 other islet cell types (Figure 3d, Supplementary Figure 9, Supplementary Table 6). When next  
278 considering only the 7.2k beta cells, we observed the strongest positive correlation between  
279 fasting glucose level and motifs in TF families enriched for  $INS^{high}$  beta cells (from Figure 2) such  
280 as RFX ( $\rho=.12$ ,  $P=2.58 \times 10^{-24}$ ), FOXA ( $\rho=.11$ ,  $P=5.41 \times 10^{-19}$ ), and MAF ( $\rho=.14$ ,  $P=5.36 \times 10^{-32}$ ), and  
281 negative correlation with  $INS^{low}$  beta cell TF motifs such as FOS/JUN and ATF (JUND  $\rho=-.23$ ,  
282  $P=1.23 \times 10^{-85}$ , ATF4  $\rho=-.12$ ,  $P=1.18 \times 10^{-23}$ ) (Figure 3d, Supplementary Table 6). Interestingly, for  
283 T2D, both the strongest positive and negative correlations included motifs for TF families enriched  
284 in  $INS^{low}$  beta cell such as CCAAT and CREB (NFYA  $\rho=.073$ ,  $P=1.72 \times 10^{-9}$ , CREB1  $\rho=.053$ ,  
285  $P=7.44 \times 10^{-6}$ ) and FOS/JUN (FOS::JUN  $\rho=-.06$ ,  $P=2.45 \times 10^{-6}$ ) (Supplementary Figure 9,  
286 Supplementary Table 6). Together these results provide state-resolved insight into the role of beta  
287 cells and beta cell TFs in T2D risk and fasting glucose level.

288

### 289 **Genome-wide predictions of variant effects on islet cell type- and state-specific regulatory** 290 **sequence**

291 Predicting the effects of non-coding genetic variants on regulatory activity remains a major  
292 challenge, in large part because the sequence vocabularies that encode regulatory function differ  
293 between cell types and states. Our cell type- and state-resolved accessible chromatin profiles  
294 provided an ideal opportunity to apply machine learning to model these regulatory vocabularies  
295 and use these models to predict the effects of genetic variants on putative regulatory sequences.  
296 We therefore used deltaSVM<sup>70</sup> to predict the effects of genetic variants from the Haplotype  
297 Reference Consortium panel<sup>71</sup> on chromatin accessibility in each endocrine cell type and cell state  
298 (see Methods). We identified 543,537 variants genome-wide with predicted allelic effects  
299 (FDR<.1), encompassing between 128k-210k variants (9.1%-14.8% of tested variants) per cell  
300 type or state (Figure 4a, Supplementary Data 3).

301 To validate that our predictions captured true allelic effects on islet chromatin accessibility, we  
302 first compared alpha and beta cell predictions to allelic imbalance in chromatin accessibility  
303 measured directly from read count data at heterozygous variants in each sample (see Methods).  
304 We found significant correlations between predicted allelic effects and allelic imbalance estimates  
305 for all alpha and beta cell states ( $GCG^{high}$  Spearman  $\rho=.261$ ,  $P=3.27 \times 10^{-46}$ ,  $GCG^{low}$   $\rho=.225$ ,  
306  $P=4.38 \times 10^{-10}$ ,  $INS^{high}$   $\rho=.285$ ,  $P=1.13 \times 10^{-53}$ ,  $INS^{low}$   $\rho=.297$ ,  $P=2.28 \times 10^{-40}$ ) (Figure 4b). We further  
307 validated five likely causal T2D variants identified in fine-mapping studies and predicted to have  
308 allelic effects on beta cell chromatin using gene reporter assays in the MIN6 beta cell line. In each  
309 case, reporter assays showed significant allelic effects on enhancer activity that were directionally  
310 consistent with predictions (Figure 4c). We also compared predictions to chromatin accessibility  
311 quantitative trait loci (caQTLs) previously identified in ensemble islet samples<sup>72</sup>. We observed  
312 highly significant enrichment of caQTLs among variants with predicted effects on alpha or beta  
313 cells (obs.=38.8%, exp.=23.6%, two-sided Fisher's exact  $P=1.64 \times 10^{-66}$ ) (Figure 4d). When sub-  
314 dividing predictions based on those with shared, cell type-specific (alpha, beta) or state-specific  
315 (hormone-high, hormone-low) effects we observed significant enrichment of caQTLs only among  
316 shared effect variants (Figure 4d), suggesting that islet caQTLs may have lower sensitivity for  
317 variants with cell type- or state-specific effects.

318 We thus sought to further characterize genetic variants predicted to have cell type- and state-  
319 dependent effects on islet chromatin. For each category of variants, we performed motif  
320 enrichment comparing sequences around the effect allele to the non-effect allele (see Methods).  
321 Variants with state-specific effects tended to disrupt motifs for TF families such as NEUROD,  
322 FOXA, MAF and RFX for hormone-high states ( $-\log_{10}(P)=59.2, 56.0, 50.3, 20.6$ ), and signaling-  
323 responsive TF families such as JUN/FOS and CREB for hormone-low states ( $-\log_{10}(P)=107.6,$   
324  $46.8$ ) (Figure 4e). Similarly, variants with alpha or beta cell-specific effects tended to disrupt motifs  
325 for lineage-defining TFs and TF families including GATA for alpha cells ( $-\log_{10}(P)=24.8$ ), and  
326 NKX6 and PDX1 for beta cells ( $-\log_{10}(P)=17.0, 13.0$ ) (Figure 4e). In order to assign motifs to  
327 specific TFs, we again examined promoter-accessibility of TFs within the structural TF subfamily<sup>48</sup>  
328 (see Methods). For example, among GATA subfamily members only GATA6 had high promoter  
329 accessibility in alpha cells ( $GCG^{high}$ : 1.00,  $GCG^{low}$ : .97,  $INS^{high}$ : .21,  $INS^{low}$ : .13), suggesting that  
330 GATA6 binding is likely disrupted in alpha cells by variants affecting the GATA motif. Similarly,  
331 among NKX6 subfamily members, NKX6-1 and NKX6-3 had promoter accessibility in beta cells  
332 ( $NKX6-1$   $GCG^{high}$ : .78,  $GCG^{low}$ : .80,  $INS^{high}$ : .98,  $INS^{low}$ : 1.00;  $NKX6-3$   $GCG^{high}$ : 0,  $GCG^{low}$ : 0,



333  $INS^{high}$ : .18,  $INS^{low}$ : .19), and among RFX family members RFX6 had promoter accessibility in  
334 hormone-high state cells ( $GCG^{high}$ : .93,  $GCG^{low}$ : .68,  $INS^{high}$ : 0.88,  $INS^{low}$ : .85) (Figure 4e).

335 Predictions of allelic effects are particularly important in interpreting the function of low frequency  
336 non-coding variants, which are impractical to assay by standard approaches such as QTL  
337 mapping without very large sample sizes. We thus evaluated whether our predictions could  
338 prioritize lower frequency (defined as minor allele frequency [MAF]<.05) functional variants  
339 involved in T2D risk. We compared T2D association at different p-value thresholds for lower  
340 frequency variants with significant effects for any endocrine cell type, as well as for each cell type  
341 individually, to background variants without predicted effects (see Methods). We observed  
342 enrichment of genome-wide significant T2D associations among lower frequency variants with  
343 predicted effects in any endocrine cell type compared to background (Figure 4f). When  
344 considering effects in each cell type, we observed enrichment of T2D association among variants  
345 with predicted effects in beta cells as well as delta cells, even down to sub-genome-wide  
346 significant p-values (Figure 4f). We next highlighted specific low frequency, T2D risk variants with  
347 predicted effects. At the *IGF2BP3* locus, rs78840640 (MAF=.02) had allelic effects on beta cell  
348 chromatin ( $INS^{high}$  beta  $q$ =.0015;  $INS^{low}$  beta  $q$ =.041), and fine-mapping data supported a causal  
349 role in T2D (posterior probability [PPA]=.33) (Figure 4g). We confirmed in gene reporter assays  
350 that this variant affected enhancer activity where the alternate (and T2D risk) allele G had reduced  
351 activity (Figure 4c). We also observed predicted effects for rare T2D variants for example  
352 rs186384225 (MAF=.0037) at *TCF7L2* and rs571342427 (MAF=.0015) at *INS-IGF2*  
353 (Supplementary Figure 10a-b). These results reveal that cell type-specific chromatin can provide  
354 accurate functional predictions of lower frequency variants, enabling more effective interpretation  
355 of genome sequence from patients and disease cohorts.

356

### 357 **Co-accessibility links distal regulatory variants to putative target genes in distinct islet cell** 358 **types and states**

359 Defining the genes affected by regulatory element activity remains a major challenge, as  
360 enhancers can regulate gene activity over large, non-adjacent distances<sup>73</sup>. A number of  
361 approaches have been developed to link regulatory elements to target genes including 3D  
362 chromatin architecture assays and correlation of accessible chromatin activity across multiple  
363 samples<sup>74,75</sup>. While these approaches have different strengths, a common weakness is reliance  
364 on ensemble data and non-cell type-resolved information<sup>27,76</sup>. Recently, a new approach was  
365 developed to link regulatory elements based on co-accessibility across single cells<sup>6</sup>, which has



366 the potential to provide cell type-resolved enhancer-promoter relationships. We thus sought to  
367 leverage accessible chromatin profiles across thousands of islet cells to define co-accessibility  
368 between sites in specific cell types. For these analyses we again focused on alpha and beta cells  
369 where cell numbers (5,594 and 7,170 cells, respectively) gave us the most power to effectively  
370 derive co-accessibility maps.

371 To calibrate the extent to which co-accessibility reflected physical interactions between regulatory  
372 elements, we first performed a distance-matched comparison between co-accessible sites  
373 stratified by co-accessibility threshold to chromatin loops identified from Hi-C and promoter  
374 capture Hi-C (pcHi-C) assays in primary islets<sup>27,76</sup>. We observed strong enrichment for pairs of  
375 sites with co-accessibility scores  $>.05$  in both alpha and beta cells for islet chromatin loops  
376 identified from pcHi-C and Hi-C compared to sites that had no evidence for co-accessibility (Figure  
377 5a, Supplementary Figure 11a-c). We therefore used this threshold (.05) to define co-accessibility,  
378 through which we identified 593,769 co-accessible sites in alpha cells (Supplementary Data 4)  
379 and 487,549 co-accessible sites in beta cells (Supplementary Data 5). There were 64,045 (alpha)  
380 and 57,374 (beta) unique distal sites co-accessible with a gene promoter (median 2 promoters  
381 per site), and 19,872 (alpha) and 19,269 (beta) unique gene promoters co-accessible with a distal  
382 site (median 9 per gene in alpha, 6 in beta cells) (Supplementary Figure 11d-e).

383 Among co-accessible links to gene promoters, the majority (71.9%) were alpha or beta cell-  
384 specific, highlighting the value of single cell-resolved data for identifying putative cell type-specific  
385 regulatory interactions. As an example of cell type-specific co-accessibility, the *PDX1* promoter  
386 had co-accessibility with 35 sites in beta cells, including a site over 500 kb distal that directly  
387 coincided with an islet pcHi-C loop, only 7 of which were also found in alpha cells (Figure 5b). In  
388 another example, at the *ARX* locus, 17 sites were co-accessible with the *ARX* promoter in alpha  
389 cells, none of which were co-accessible in beta cells (Supplementary Figure 11f). Conversely, as  
390 an example of shared co-accessibility across cell types, the *NEUROD1* promoter was co-  
391 accessible with 52 and 47 chromatin sites in alpha and beta cells, respectively, of which 26 were  
392 shared and several were over 500 kb distal (Supplementary Figure 11g).

393 Given heterogeneity in alpha and beta cell regulatory programs, we next cataloged co-accessible  
394 links between distal alpha and beta cell sites and gene promoters that had differential activity  
395 across and hormone-high and -low states (see Methods). We observed 25,012 (alpha) and 9,641  
396 (beta) co-accessible links where both the distal site (unique distal sites: alpha=10,926,  
397 beta=7,958) and the gene promoter (unique promoters: alpha=1,951, beta=1,516) were  
398 differentially active between states in the same direction. State-dependent co-accessible links

399 included both gene promoters active in the hormone-high state such as *INS*, *GCG*, *G6PC2*, and  
400 *NEUROD1*, and gene promoters active in the hormone-low state such as *FOSL1*, *FOSL2*,  
401 *CREB1*, and *CREB5*. We also identified genes with different isoform promoters co-accessible  
402 with hormone-high and hormone-low dependent distal sites such as *GLIS3* (Supplementary  
403 Figure 11h), suggesting these genes have distinct regulatory programs driving isoform-specific  
404 activity across different cell states.

405 Distal sites with co-accessibility links to gene promoters harbored risk variants for T2D at many  
406 loci, suggesting this approach can prioritize target genes of T2D risk variants in islets. We  
407 observed one such example at the *KCNQ1* locus, where an islet chromatin site located in intron  
408 3 of *KCNQ1* had beta cell-specific co-accessibility with the *INS* promoter over 500 kb distal and  
409 harbored a causal T2D risk variant rs231361 (PPA=1)<sup>10</sup>. (Figure 5c). Published 4C data from the  
410 EndoC- $\beta$ H1 human beta cell line<sup>77</sup> anchored on the *INS* promoter supported the existence of  
411 physical interactions between this site and the *INS* promoter in beta cells (Supplementary Figure  
412 12a). Interestingly, the site was more accessible in *INS*<sup>high</sup> beta cells compared to *INS*<sup>low</sup> beta  
413 cells, and rs231361 was predicted to have state-specific effects on beta cell chromatin  
414 accessibility (*INS*<sup>high</sup> beta FDR q=.060; *INS*<sup>low</sup> beta FDR q=.40). Furthermore, rs231361 disrupted  
415 an *RFX* family sequence motif, which itself was enriched in the *INS*<sup>high</sup> beta cell state (Figure 5c,  
416 also see Figure 2c). The *KCNQ1* locus is also associated with quantitative measures of insulin  
417 secretion<sup>78–81</sup> and fasting glucose level<sup>82</sup>, suggesting that the mechanism of action of this locus  
418 on T2D risk is likely mediated through beta cell function in a state-dependent manner.

419 To validate the effects of the chromatin site containing rs231361 on distal regulation of *INS* in  
420 beta cells, we deleted a 2.6 kb region flanking the site in human embryonic stem cells (hESCs)  
421 by CRISPR/Cas9-mediated genome editing, generating three bi-allelic deletion clones  
422 (*KCNQ1* <sup>$\Delta$ Enh</sup>) (Figure 5c, Supplementary Figure 12b-c). We then differentiated the three  
423 *KCNQ1* <sup>$\Delta$ Enh</sup> clones as well as two unedited control clones into beta cells using an established  
424 protocol<sup>83</sup> with minor modifications (see Methods). Analysis of cultures at the beta cell stage  
425 revealed similar numbers of *INS*<sup>+</sup> cells in *KCNQ1* <sup>$\Delta$ Enh</sup> and control clones (91.1 $\pm$ 4.02% vs  
426 94.6 $\pm$ 2.11%) (Supplementary Figure 12d), suggesting that the enhancer deletion had no effect  
427 on beta cell differentiation. Further supporting this conclusion, similar numbers of cells expressed  
428 the beta cell marker *NKX6-1* in *KCNQ1* <sup>$\Delta$ Enh</sup> and control cultures (Supplementary Figure 12e).  
429 Likewise, *NKX6-1* mRNA levels were similar (FDR=0.98) (Supplementary Figure 12f). Next, we  
430 determined effects of the enhancer deletion on gene expression in *cis*, interrogating all genes  
431 within 2 Mb of the enhancer. We observed a significant decrease in the expression of *INS*

432 ( $P=3.02 \times 10^{-4}$ ; FDR=0.066) and *CDKN1C* ( $P=1.96 \times 10^{-4}$ ; FDR=0.059) in *KCNQ1*<sup>ΔEnh</sup> compared to  
433 control cells, whereas other genes in the region showed no difference in expression (all  $P > .05$ ;  
434 note *KCNQ1* itself was not expressed) (Figure 5d). Analysis of INS protein by  
435 immunofluorescence staining, flow cytometry, and ELISA further revealed reduced INS protein  
436 abundance in *KCNQ1*<sup>ΔEnh</sup> beta cells (Figure 5e-g). In contrast, beta cell NKX6-1 protein levels  
437 were not affected (Supplementary Figure 12e), confirming specific effects of the enhancer  
438 deletion on *INS* mRNA and protein expression in beta cells.

439

#### 440 **A resource of islet cell type and state regulatory programs to annotate T2D risk variants**

441 Together our results provide a multi-tiered reference of islet cell type and cell state regulatory  
442 programs through which non-coding genetic variants can be comprehensively annotated. As most  
443 genetic risk variants for diabetes are non-coding, this resource can be used to interpret their  
444 molecular mechanisms. We therefore annotated the islet cell type-specific regulatory programs  
445 of T2D risk variants using fine-mapping ‘credible sets’ of 402 risk signals<sup>10,84</sup>. Fine-mapped  
446 credible set variants at 239 risk signals mapped within an islet cell type chromatin site and, at 97  
447 of these 239 risk signals, credible set variants also had both predicted allelic effects and co-  
448 accessibility with a gene promoter (Supplementary Table 7).

449 Genes co-accessible with fine-mapped credible set T2D variants in islet cell type chromatin were  
450 enriched for biological processes related to protein localization and transport, stress response,  
451 cell cycle, and signal transduction (Supplementary Table 8). Co-accessible genes also included  
452 numerous genes involved in monogenic diabetes such as *INS*, *KCNJ11*, *ABCC8*, *HNF1A*,  
453 *HNF4A*, *GCK*, and *NKX2-2*, as well as TFs in structural families with lineage- and state-specific  
454 motif enrichments (from Figures 1-2) such as *NKX6-1*, *NFATC2* and *RFX6*. At 22 T2D loci, fine-  
455 mapped variants at multiple independent risk signals were co-accessible with the same gene,  
456 providing independent support for the role of these genes in T2D. For example, at the *KCNQ1*  
457 locus (11p15), fine-mapped variants at four T2D risk signals (including rs231361 above) were in  
458 sites co-accessible with the *INS* promoter (Supplementary Figure 13a), and at the *CDKN2A/B*  
459 locus (9p21), fine-mapped variants at five T2D signals were in sites co-accessible with the  
460 *CDKN2A*, *MTAP* and *DMRTA1* promoters (Supplementary Figure 13b). In other examples, at the  
461 *DGKB* locus (7p21), fine-mapped variants at two T2D signals were in sites co-accessible with the  
462 *DGKB* promoter (Supplementary Figure 13c), and at 7p13 fine-mapped variants at two T2D  
463 signals were in sites co-accessible with the *GCK* promoter (Supplementary Figure 13d).

464 In order to effectively provide these data to the community to facilitate hypothesis testing and  
465 mechanistic discovery, we developed a publicly-accessible web portal and database  
466 (<https://www.t2depigenome.org>) which contains processed data and islet cell type annotations  
467 generated in this study, as well as epigenomic data from islets and other diabetes-relevant tissues  
468 available in other published studies (Supplementary Figure 14a-f). In addition, the portal enables  
469 the user to query genetic variants for their respective islet cell type annotations.

470

## 471 **Discussion**

472

473 Our findings provide a roadmap demonstrating how single cell accessible chromatin data derived  
474 from disease-relevant primary tissue can be utilized to define the cell types, cell states, *cis*  
475 regulatory elements and genes involved in the genetic basis of complex disease. Over 400 known  
476 risk signals for T2D have been identified, yet only a handful have been characterized  
477 molecularly<sup>16,18,27,85-91</sup>. Identifying the genes affected by non-coding risk variants is paramount for  
478 understanding the molecular pathways dysregulated in disease and can inform therapeutic target  
479 discovery. Candidate target genes of T2D risk signals derived using single cell co-accessibility  
480 were highly enriched for disease-relevant biological processes, and many of these genes serve  
481 as compelling targets for mechanistic study. At the *KCNQ1* locus, co-accessibility data and hESC  
482 beta cell models revealed that a long-range enhancer harboring a causal T2D variant affects  
483 insulin expression and protein levels in beta cells. Mutations of *INS* cause monogenic diabetes  
484 and tandem repeats in *INS* affect T1D risk<sup>92,93</sup>, but to our knowledge *INS* has not been directly  
485 implicated in T2D risk. The *KCNQ1* locus has a complex contribution to T2D with 10 signals in  
486 the region that each confer independent risk<sup>10</sup>, four of which had beta cell co-accessibility with the  
487 *INS* promoter. We therefore speculate that the *KCNQ1* locus mediates T2D risk through multiple  
488 long-range regulatory effects on *INS*, in addition to *CDKN1C* and other genes.

489 Single cell accessible chromatin uncovered heterogeneity in the regulatory programs of endocrine  
490 cell types, revealing cell type- and state-resolved effects of genetic variants on fasting glucose  
491 and T2D risk. Previous studies have characterized heterogeneity in beta cell physiological  
492 function, cell surface markers, and gene expression<sup>22,94,95</sup>. The heterogeneity we observed in the  
493 beta cell epigenome mapped to cellular states related to insulin production and stress-related  
494 signaling response<sup>23</sup>, and we identified TFs likely driving cell state-specific functions. Integrating  
495 single cell heterogeneity with large-scale genetic association data revealed that genetic variants  
496 modulating fasting glucose levels likely act through the insulin-producing beta cell state, whereas

497 genetic risk of T2D is mediated through both the insulin-producing state and other functional beta  
498 cell state(s). Moreover, given similar heterogeneity in the epigenomes of alpha and delta cells,  
499 our results reveal that endocrine cell regulation involves both lineage-specific programs as well  
500 as an additional layer of state-specific programs common across endocrine cell types.

501 In summary, we present the most detailed characterization of islet cell type and state regulatory  
502 programs to date and a web resource to query these programs. When combined with genetic fine-  
503 mapping and genome sequencing, this resource will greatly enhance efforts to define molecular  
504 mechanisms of T2D risk. More broadly, our study provides a framework for using single cell  
505 chromatin from disease-relevant tissues to interpret the genetics and biological mechanisms of  
506 complex disease.

507

## 508 **Methods**

509

### 510 **Islet processing and nuclei isolation**

511 We obtained islet preparations from three donors for the Integrated Islet Distribution Program  
512 (IIDP) (Supplementary Table 1). Islet preparations were further enriched using zinc-dithizone  
513 staining followed by hand picking. Studies were given exempt status by the Institutional Review  
514 Board (IRB) of the University of California San Diego.

515

### 516 **Generation of snATAC-seq libraries**

517 Combinatorial barcoding single nuclear ATAC-seq was performed as described previously<sup>2,4</sup> with  
518 several modifications as described below. For each donor (N=3), approximately 3,000 islet  
519 equivalents (IEQ, roughly 1,000 cells each) were resuspended in 1 ml nuclei permeabilization  
520 buffer (10mM Tris-HCL (pH 7.5), 10mM NaCl, 3mM MgCl<sub>2</sub>, 0.1% Tween-20 (Sigma), 0.1%  
521 IGEPAL-CA630 (Sigma) and 0.01% Digitonin (Promega) in water) and homogenized using 1ml  
522 glass dounce homogenizer with a tight-fitting pestle for 15 strokes. Homogenized islets were  
523 incubated for 10 min at 4°C and filtered with 30 µm filter (CellTrics). Nuclei were pelleted with a  
524 swinging bucket centrifuge (500 x g, 5 min, 4°C; 5920R, Eppendorf) and resuspended in 500 µL  
525 high salt tagmentation buffer (36.3 mM Tris-acetate (pH = 7.8), 72.6 mM potassium-acetate,  
526 11 mM Mg-acetate, 17.6% DMF) and counted using a hemocytometer. Concentration was  
527 adjusted to 4500 nuclei/9 µl, and 4,500 nuclei were dispensed into each well of a 96-well plate.  
528 Glycerol was added to the leftover nuclei suspension for a final concentration of 25 % and nuclei  
529 were stored at -80°C. For tagmentation, 1 µL barcoded Tn5 transposomes<sup>4,96</sup> were added using

530 a BenchSmart™ 96 (Mettler Toledo), mixed five times and incubated for 60 min at 37 °C with  
531 shaking (500 rpm). To inhibit the Tn5 reaction, 10 µL of 40 mM EDTA were added to each well  
532 with a BenchSmart™ 96 (Mettler Toledo) and the plate was incubated at 37 °C for 15 min with  
533 shaking (500 rpm). Next, 20 µL 2 x sort buffer (2 % BSA, 2 mM EDTA in PBS) were added using  
534 a BenchSmart™ 96 (Mettler Toledo). All wells were combined into a FACS tube and stained with  
535 3 µM Draq7 (Cell Signaling). Using a SH800 (Sony), 20 nuclei were sorted per well into eight 96-  
536 well plates (total of 768 wells) containing 10.5 µL EB (25 pmol primer i7, 25 pmol primer i5, 200  
537 ng BSA (Sigma), PMID: 29434377). Preparation of sort plates and all downstream pipetting steps  
538 were performed on a Biomek i7 Automated Workstation (Beckman Coulter). After addition of 1 µL  
539 0.2% SDS, samples were incubated at 55 °C for 7 min with shaking (500 rpm). We added 1 µL  
540 12.5% Triton-X to each well to quench the SDS and 12.5 µL NEBNext High-Fidelity 2× PCR  
541 Master Mix (NEB). Samples were PCR-amplified (72 °C 5 min, 98 °C 30 s, (98 °C 10 s, 63 °C 30 s,  
542 72 °C 60 s) × 12 cycles, held at 12 °C). After PCR, all wells were combined. Libraries were purified  
543 according to the MinElute PCR Purification Kit manual (Qiagen) using a vacuum manifold (QIAvac  
544 24 plus, Qiagen) and size selection was performed with SPRI Beads (Beckmann Coulter, 0.55x  
545 and 1.5x). Libraries were purified one more time with SPRI Beads (Beckmann Coulter, 1.5x).  
546 Libraries were quantified using a Qubit fluorimeter (Life technologies) and the nucleosomal  
547 pattern was verified using a Tapestation (High Sensitivity D1000, Agilent). The library was  
548 sequenced on a HiSeq2500 sequencer (Illumina) using custom sequencing primers, 25% spike-  
549 in library and following read lengths: 50 + 43 + 40 + 50 (Read1 + Index1 + Index2 + Read2).  
550

#### 551 **Raw data processing and quality control**

552 For each read, we first appended the cell barcode metadata to the read name. The cell barcode  
553 consisted of four pieces (P7, I7, I5, P5) which were derived from the index read files. We first  
554 corrected for sequencing errors by calculating the Levenshtein distance between each of the four  
555 pieces and a whitelist of possible sequences. If the piece did not perfectly match a whitelisted  
556 sequence, we took the best matching sequence if it was within 2 edits and the next matching  
557 sequence was at least 2 additional edits away. If none of these conditions were met, we discarded  
558 the read from further analyses.

559 We trimmed Nextera adapter sequences from sequence reads using trim\_galore (v.0.4.4,  
560 <https://github.com/FelixKrueger/TrimGalore>) with default parameters. We used bwa mem<sup>97</sup>  
561 (v.0.7.17-r1188) to align reads to the hg19 reference genome with the options '-M -C'. We then  
562 used samtools<sup>98</sup> to filter out reads that did not align to the autosomes or sex chromosomes and



563 low mapping quality reads (MAPQ<30). We used samtools fixmate (v.1.6) to perform additional  
564 checks for FR proper pairs and removed secondary or unmapped reads. We used the  
565 MarkDuplicates tool from picard (<https://broadinstitute.github.io/picard/>) to remove duplicates on  
566 a per-barcode basis with 'BARCODE\_TAG' option. For each experiment, we used a Gaussian  
567 mixture model on log-transformed read depths to separate barcodes with a 99% probability of  
568 belonging to the high read distribution, likely representing real cells, from those in the low read  
569 distribution, likely representing background reads. We then set an additional threshold of 1000  
570 read depth, reasoning that low read cells would contribute additional noise to clustering.

571

### 572 **Cluster analysis for snATAC-seq**

573 We split the genome into 5 kb windows and removed windows overlapping blacklisted regions  
574 from ENCODE (<https://sites.google.com/site/anshulkundaje/projects/blacklists>). For each  
575 experiment, we then created a sparse  $m \times n$  matrix containing read depth for  $m$  cells passing read  
576 depth thresholds at  $n$  windows. For further quality checks, we performed initial clustering for each  
577 experiment individually using scanpy<sup>99</sup> (v.1.4). We extracted highly variable windows using mean  
578 read depths and normalized dispersion. After normalization to a uniform read depth and log-  
579 transformation of read depth, we regressed out the log-transformed total read depth for each cell.  
580 We then performed PCA and extracted the top 50 principal components. We used these  
581 components to calculate the nearest 30 neighbors using the cosine metric, which were  
582 subsequently used for UMAP dimensionality reduction with the parameters 'min\_dist=0.3' and  
583 Louvain clustering with the parameters 'resolution=1.5'. For each experiment, we removed 2,709  
584 cells that were in clusters corresponding to low read depth.

585 After removing these cells, we used similar methods to cluster cells from all experiments together  
586 with the following modifications. We extracted highly variable windows across cells from all  
587 experiments. Since read depth was a technical covariate specific to each experiment, we  
588 regressed this out on a per-experiment basis. We used mutual nearest neighbors correction<sup>30</sup>  
589 (mnnpy, v.0.1.9.4) to adjust for batch effects across experiments with the parameters 'k=10'. We  
590 then performed clustering as described above. We used chromatin accessibility at windows  
591 overlapping promoters for marker hormones (*GCG*, *INS-IGF2*, *SST*, and *PPY*) to assign cell types  
592 for the endocrine islet cell types (alpha, beta, delta, and gamma). We performed re-clustering on  
593 non-endocrine islet clusters and used chromatin accessibility at windows around marker genes  
594 from single cell RNA-seq to assign cluster labels. In our clustering results, we identified a cluster  
595 of 694 alpha cells that were mostly derived from a single donor (96% of cells from Islet 1). Because



596 we were uncertain whether this represented technical or biological differences, we excluded this  
597 cluster from further analyses. We also excluded a cluster of 192 cells likely representing lower  
598 quality cells as it had low intra-cluster similarity and lower fraction of reads in peaks.

599

### 600 **Comparison to bulk and sorted islet ATAC-seq**

601 We obtained raw sequence data of ATAC-seq for 42 bulk islet samples from four prior  
602 studies<sup>14,27,28,72</sup> and 4 bulk pancreas samples from ENCODE. We re-processed all samples with  
603 a uniform pipeline: we aligned all reads to hg19 with bwa mem, identified and removed duplicate  
604 reads with picard MarkDuplicates, and called peaks with MACS2 (v.2.1.2) with the parameters  
605 ‘—shift -100 —extsize 200 —keep-dup all’. For the three islet snATAC-seq samples, we used  
606 aggregated per-barcode deduplicated reads to call peaks. We defined all possible accessibility  
607 peaks by filtering out ENCODE blacklisted regions and retaining merged peaks on autosomal  
608 chromosomes found in more than one sample. We then calculated the read coverage at all  
609 possible accessibility peaks and TPM-normalized the counts. We calculated the Spearman  
610 correlation between normalized read coverages and used hierarchical clustering to assess  
611 similarity between bulk islet samples. To check peak call overlap between aggregated single cell  
612 ATAC and bulk ATAC data, we split peaks based into promoter proximal (+/-500 bp from  
613 GENCODE transcript TSS) and distal peaks based on promoter overlap. For each cluster, we  
614 calculated the percentage of aggregate peaks that overlapped merged autosomal bulk peaks and  
615 individual sample-level autosomal bulk peaks.

616 We also obtained raw sequence data of ATAC-seq from flow-sorted pancreatic cells (alpha, beta,  
617 acinar, ductal) from two prior studies<sup>35,36</sup> and re-processed all samples with the uniform pipeline  
618 described above. For alpha, beta, and exocrine cells from islet snATAC-seq, we split reads on a  
619 per-donor and per-cluster basis to obtain read files. Because total read depth was highly variable  
620 across sorted samples, we merged autosomal peaks after filtering out ENCODE blacklist regions.  
621 We calculated read coverage in each sample for each merged peak and TPM normalized count  
622 values. We then calculated the Spearman correlation between normalized read coverages and  
623 used hierarchical clustering to assess similarity between sorted and snATAC-seq islet samples.

624

### 625 **Identifying marker peaks of chromatin accessibility**

626 To identify peaks for each cell type, we aggregated reads for all cells within a cluster or sub-  
627 cluster. We shifted reads aligning to the positive strand by +4 bp and reads aligning to the negative

628 strand by -5 bp, extended reads to 200 bp, and centered reads. We used MACS2<sup>100</sup> to call peaks  
629 of chromatin accessibility for each aggregated read file with the following settings '--nomodel --  
630 keep-dup all'. We removed peaks that overlapped ENCODE blacklisted regions<sup>101</sup>. We then used  
631 bedtools<sup>102</sup> to merge peaks from all clusters and sub-clusters to create a superset of islet  
632 regulatory peaks.

633 We generated a sparse  $m \times n$  binary matrix containing binary overlap between  $m$  peaks in the  
634 superset of islet regulatory peaks and  $n$  cells. We then calculated t-statistics of peak specificity  
635 for each cluster or sub-cluster through linear regression models. We used binary encodings to  
636 specify which donor a given cell came from as covariates in the model. For each peak and cluster,  
637 we used binary encoding of read overlap with the peak as the predictor and whether a cell was in  
638 the cluster (1 if yes, -1 if no) as the outcome.

639

#### 640 **Matching islet snATAC-seq with scRNA-seq clusters**

641 To verify that clusters definitions and labels from single cell chromatin accessibility data matched  
642 those from single cell expression data, we obtained published single cell RNA-seq data from 12  
643 non-diabetic islet donors<sup>23</sup>. Because cluster definitions for all cell types were not available, we re-  
644 analyzed the data and performed clustering analyses. Starting with the gene expression matrix,  
645 we first performed quality control steps to remove potential doublets. For each marker gene of  
646 different cell types *GCG* (alpha), *INS* (beta), *SST* (delta), *PPY* (gamma), *CTRB2* (acinar), *CFTR*  
647 (ductal), *PLVAP* (endothelial), *PDGFRB* (stellate), and *C1QC* (immune) we used a Gaussian  
648 mixture model on log-transformed read depth to determine whether a cell expressed the gene  
649 (high distribution) or not (low distribution). We verified that cells expressing more than one marker  
650 gene had on average higher read depth and expressed more genes (Supplementary Figure 3a,b).  
651 We regressed out covariates including sex, BMI, and read depth, and separated cells by donor of  
652 origin. We then used MNN correction<sup>30</sup> to adjust for batch effects. After scaling the data, we  
653 performed PCA and used the top 50 principal components to calculate the 10 nearest neighbors  
654 using the cosine metric. We used the nearest neighbor map for UMAP dimensionality reduction  
655 with the parameters 'min\_dist=0.3' and to perform Louvain clustering with the parameters  
656 'resolution=1' (Supplementary Figure 3c). We used a similar regression framework as the  
657 chromatin accessibility marker peaks to calculate t-statistics for gene specificity for each cluster  
658 (Supplementary Figure 3d,e) with the following modifications: we included sex, BMI, and log-  
659 transformed read coverage as covariates and used  $\log_2$  read counts for each gene instead of  
660 binary peak coverage as the predictor.

661

662 We used the Spearman correlation between t-statistics from islet snATAC-seq and scRNA-seq  
663 data to match up clusters. Specifically, we took the top 100 (sorted by descending t-statistic) most  
664 specific promoter peaks for each cluster or sub-cluster to define a list of genes for comparison.  
665 To facilitate one-to-one comparisons between the two datasets, for this analysis only we defined  
666 promoter peaks as peaks within +/-500 bp of a GENCODE v19 gene TSS. This list contained 966  
667 genes, which is less than 100x13 (number of clusters) because 1) marker genes were sometimes  
668 shared between sub-clusters and 2) not all genes were present in the expression dataset. For  
669 each cluster from accessible chromatin data, we then compared t-statistics of genes in the list  
670 with t-statistics for all clusters from single cell expression using the Spearman correlation, which  
671 is robust to very specific marker genes such as insulin which could otherwise bias these  
672 comparisons.

673

#### 674 **Motif enrichment with chromVAR**

675 We used chromVAR<sup>37</sup> (v.1.5.0) to calculate TF motif-associated difference between cell  
676 populations. We first calculated counts per peak per cell matrix and then input it to chromVAR.  
677 We filtered cells with minimal reads less than 1500 (min\_depth=1500) and peaks with fraction of  
678 reads less than 0.15 (min\_in\_peaks=0.15) by using 'filterSamplesPlot' function from chromVAR.  
679 We also corrected GC bias based on 'BSgenome.Hsapiens.UCSC.hg19' using 'addGCBias'  
680 function. Then we used the Jaspar motifs from 'getJasparMotifs' function with default parameter  
681 and calculated the deviation z-scores for each TF motif in each cell by using 'computeDeviations'  
682 function. High-variance TF motifs across all cell types were selected by 'computeVariability'  
683 function using cut-off 1.2 (N=111). For each of these variable motifs, we calculated the mean z-  
684 score for each cell types and normalized the values to 0 (minimal) and 1 (maximal).

685

#### 686 **Comparison of alpha and beta cell states**

687 To identify TF motifs variable between alpha or beta cell states, we performed two-sided Student's  
688 T-test on motif z-scores between cells labeled as alpha 1 ( $GCG^{high}$ ) and alpha 2 ( $GCG^{low}$ ) cells or  
689 beta 1 ( $INS^{high}$ ) and beta 2 ( $INS^{low}$ ). We adjusted raw p-values with the Benjamini-Hochberg  
690 procedure to obtain FDR. Motifs with FDR less than 0.05 and absolute difference ( $\Delta$ ) in z-score  
691 (between  $GCG^{high}/GCG^{low}$  alpha or  $INS^{high}/INS^{low}$  beta) greater than 0.5 were defined as differential  
692 motifs (N=46 for beta cells, N=109 for alpha cells and N=111 motifs combined). For these 111

693 motifs that were variable between alpha or beta cell states, we summarized the mean z-scores  
694 over  $GCG^{high}$ ,  $GCG^{low}$ ,  $INS^{high}$  and  $INS^{low}$  cells and plotted the normalized value. In order to check  
695 how motif usage changed along the trajectories, we smoothed motif z-scores along the trajectory  
696 for alpha and beta cells separately at step=0.05, using the shrinkage version of cubic regression  
697 spline ('gam' function from the R package 'mgcv' (v1.8.28) with parameter bs='cs'). We then  
698 smoothed motif enrichment profiles and normalized values for visualization. We identified specific  
699 TFs likely driving enrichments for a given motif through high Spearman correlation ( $\sigma > .9$ ) between  
700 motif enrichment and promoter accessibility across the trajectory.

701 To analyze differential promoter accessibility between alpha and beta cell states, we first  
702 calculated the binary promoter by cell matrix containing information about read overlap per cell in  
703 a promoter peak. Based on this matrix and cell cluster labels, we performed two-sided Fisher's  
704 exact tests between hormone-high and hormone-low states of alpha, beta, and delta cells for  
705 each promoter against the null hypothesis that the promoter had similar accessibility across  
706 states. We used Bonferroni adjusted p-values (adjusted p-value < 0.01) for alpha and beta cells  
707 with the sign of the  $\log_2$  transformed odds ratio to identify genes whose promoter had either  
708 increased or decreased accessibility across states. Differentially-accessible promoters were  
709 further input into Enrichr<sup>103</sup> (v.1.0) to perform GO term enrichment analysis on biological  
710 processes terms (2018 version). To identify more specific processes, we filtered for gene ontology  
711 terms that contained less than 150 total genes.

712 To plot the profile of each promoter across pseudo-state, we first binned alpha cells or beta cells  
713 to 100 bins along the state trajectory. For each bin, we calculated the fraction of cells had a peak  
714 in the promoter region for each promoter. Then we smoothed these 100 fractions using the 'loess'  
715 function from R. The smoothed data were then normalized and clustered using k-medoids  
716 clustering, with k determined by optimum average silhouette width using the 'pamk' function from  
717 the R 'fpc' package (v.2.1.11.1). Genes attributed to the promoters in each cluster were then used  
718 to perform GO term enrichment analysis.

719 In order to compare with previous published data, we collected gene lists from Xin et al.<sup>23</sup>. We  
720 obtained four gene lists for Beta 1-4 subpopulations (Supplementary Table S3 in Xin et al.). For  
721 each gene list, we performed gene set enrichment analysis<sup>104</sup> using significantly differential  
722 promoters (from Figure 2a) as the gene lists to assess whether alpha and beta cell states showed  
723 concordant differences (i.e. differential promoters for  $GCG^{low}$  and  $GCG^{high}$  alpha to compare beta  
724 cell states and vice versa for alpha cells).

725

## 726 **Ordering alpha and beta cells along a trajectory and finding dynamic peaks**

727 We used Cicero<sup>6</sup> (v.1.1.5) to order all alpha and beta cells along separate trajectories. We started  
728 with a sparse binary matrix encoding overlap between the superset of islet regulatory peaks and  
729 cells. We extracted all cells belonging to alpha cell sub-clusters and filtered out peaks that were  
730 not present in alpha cells. We used the `aggregate_nearby_peaks` function from Cicero to find  
731 peaks within 10 kb and merging their counts to make an aggregate matrix. We then chose peaks  
732 to define progress with the aggregated matrix by using the `differentialGeneTest` function from  
733 `monocle2`<sup>47</sup> to search for peaks that were differentially accessible between the GCG<sup>high</sup> and  
734 GCG<sup>low</sup> states (FDR<.1), while modeling total peaks in each cell as a covariate. We then used  
735 DDRTree to reduce dimensions and ordered cells along the trajectory, setting the root position as  
736 the state with the highest glucagon promoter accessibility. We grouped cells into 10 bins based  
737 on their trajectory values. Then we repeated the same procedure for beta cells, with the  
738 modification of setting the root position by insulin promoter accessibility.

739

## 740 **GWAS enrichment with aggregate peak annotations**

741 We used cell type specific (CTS) LD score regression<sup>69,105</sup> (v.1.0.0) to calculate enrichment for  
742 GWAS traits. We obtained GWAS summary statistics for quantitative traits related to diabetes<sup>13,55–</sup>  
743 <sup>59</sup>, diabetes<sup>10</sup>, and control traits including psychiatric and autoimmune diseases<sup>60–67</sup>. We prepared  
744 summary statistics to the standard format for LD score regression. We used peaks from  
745 aggregated reads for each cluster as a binary annotation, and the superset of islet regulatory  
746 peaks as the background control. For each trait, we then used CTS LD score regression to  
747 estimate the enrichment coefficient of each annotation jointly with the background control.

748

## 749 **GWAS enrichment with single cell annotations**

750 We determined genetic enrichment of accessible chromatin profiles in individual cells. We first  
751 split the genome into 5 kb windows and removed windows overlapping blacklisted regions from  
752 ENCODE. We created a sparse  $m \times n$  matrix containing read depth for  $m$  cells passing read depth  
753 thresholds at  $n$  windows, and extracted highly variable (HV) windows using mean read depths  
754 and normalized dispersion. We then retained genetic variants mapping in HV windows with minor  
755 allele frequency [MAF]>.05 mapping outside of the major histocompatibility complex region (MHC,  
756 defined by chr6:25,000,000-35,000,000 in hg19 coordinates).

757 As the accessible chromatin profiles from an individual cell are sparse, we used the bagging  
758 algorithm in the `make_cicero_cds` function from Cicero<sup>6</sup> to aggregate cells into groups of 10. For  
759 each aggregate cell group, we created a binary annotation based on mapped reads for cells in  
760 the aggregate. We also created baseline annotations consisting of pooled islet cell type  
761 accessible chromatin sites and the 53 baseline v1.1 annotations from LD score regression<sup>68</sup>. We  
762 then annotated all variants in HV windows with the aggregate cell and baseline annotations. We  
763 determined enrichment of HV variant annotations for fasting glucose level<sup>56</sup>, type 2 diabetes<sup>10</sup>,  
764 and two control traits, major depressive disorder<sup>66</sup> and lupus<sup>63</sup> GWAS data. In order to correct for  
765 the confounding effects of linkage disequilibrium (LD), we performed LD pruning of GWAS data  
766 for each trait by first sorting variants based on p-value and iteratively removing variants in LD  
767 ( $r^2 > .5$ , 1000 Genomes European subset) with a more significant variant. To then perform  
768 enrichment tests on pruned GWAS data we used a previously described method polyTest<sup>106</sup> to  
769 jointly model the annotation for each aggregated cell group with the baseline pooled site and 53  
770 annotations from LD score baseline v1.1. We then calculated a z-score for each aggregate cell  
771 based on the effects and standard error from the resulting model. As the grouping method for  
772 Cicero uses bootstrap aggregation, a given cell was potentially assigned to multiple aggregates.  
773 We therefore calculated an enrichment z-score for each individual cell by averaging enrichment  
774 z-scores for each cell across its respective aggregates.

775 To identify TFs correlated with trait enrichments, we calculated the Spearman correlation  
776 coefficient between fasting glucose or type 2 diabetes single cell GWAS enrichment z-scores and  
777 chromVAR motif enrichment z-scores using data from all cells or within beta cells. Within each  
778 trait, we used Bonferroni correction to adjust correlation p-values for multiple tests.

779

## 780 **Mapping allelic imbalance within clusters**

781 Genomic DNA for genotyping was extracted either from spare islet nuclei (donors 1 and 2), or  
782 acinar cells (donor 3). Genomic DNA was extracted using the DNeasy Blood & Tissue Kits  
783 (Qiagen) according to manufacturer's protocol for purification of total DNA from animal blood or  
784 cells. Extracted genomic DNA was used for genotyping on the Illumina Infinium Omni2.5-8 v1.4  
785 genotyping array. For genotypes that passed quality filters (non-missing, MAF > .01 in European  
786 or African populations in 1KGP), we then imputed genotypes into the HRC reference panel r1.1<sup>107</sup>  
787 using the Michigan Imputation Server<sup>108</sup>. Post-imputation, we removed genotypes with low  
788 imputation quality ( $R^2 < .3$ ). As an additional filter to remove potential false positive heterozygote  
789 genotype calls, we removed variants that had greater than 20 read coverage without reads for



790 both alleles. Using cluster assignments for each cell, we split mapped reads for each donor into  
791 cluster-specific reads. For cluster-specific reads, we used the WASP pipeline<sup>109</sup> (v.0.3.0) to  
792 correct for reference mapping bias at heterozygous variants. We then used a two-sided binomial  
793 test to assess imbalance at heterozygous variants, assuming a null hypothesis where both alleles  
794 were equally likely to be observed. For each variant, we then calculated combined imbalance z-  
795 scores across donors using Stouffer's z-score method and used sequencing depth to weight  
796 statistics from each sample.

797

### 798 **Predicting genetic variant effects on chromatin accessibility**

799 We used deltaSVM<sup>70</sup> to predict the effects of non-coding variants on chromatin accessibility in  
800 each cell type and cell state. We obtained sequences underlying promoter-distal (>+/-500 bp from  
801 GENCODEv19 transcript TSS for protein coding and long non-coding RNA genes) peaks for each  
802 cluster, used 'genNullSeqs' to generate background sequences, and then trained a model for  
803 each cluster with 'gkmtrain' with default settings. For all possible combinations of 11mers, we then  
804 used 'gkmpredict' to predict the effects of 11mers based on the trained model for the cluster. For  
805 each SNP in the HRC reference panel r1.1<sup>107</sup> overlapping an islet cell type accessible chromatin  
806 site, we created 19 bp sequences around each allele (9 bp flanking either side of the variant  
807 base). We then used the 'deltasvm.pl' script to calculate deltaSVM scores for differential  
808 chromatin accessibility between variant alleles. We built a null distribution by randomly permuting  
809 the effects of 11mers and re-calculating deltaSVM scores and using the parameters of this null  
810 distribution, we calculated z-scores for each variant. From variant z-scores we calculated p-values  
811 and then q-values and considered variants significant at FDR<.1.

812 For variants with predicted effects on chromatin accessibility in alpha or beta cells, we categorized  
813 them based on their effects across cell type and states. Variants with significant effects in both  
814 alpha cell states but neither beta cell state were classified as "alpha" (n=10,564) and vice versa  
815 for "beta" (n=12,833). Variants with significant effects in GCG<sup>high</sup> alpha and INS<sup>high</sup> beta states but  
816 not GCG<sup>low</sup> alpha and INS<sup>low</sup> beta states were classified as "hormone-high" (n=15,769), and vice  
817 versa for "hormone-low" (n=12,471). Variants with significant effects in all four alpha and beta cell  
818 states were classified as "shared" (n=31,331). We also determined the concordance in the  
819 direction of effect for variants across alpha and beta cell states. For the set of variants with  
820 significant effects in each state, we calculated the fraction of variants where the allele with the  
821 higher predicted effect had a higher predicted effect in other states. We determined significance  
822 using a two-sided binomial test assuming an expected fraction of 50%. We assessed enrichment



823 of predicted effect variants in alpha or beta cell states for islet caQTLs<sup>72</sup> compared to any islet  
824 caQTL in alpha or beta cell sites using two-sided Fisher's exact tests. We then stratified variants  
825 with predicted effects by category (hormone-high, hormone-low, alpha, or beta) and assessed  
826 enrichment of caQTLs with predicted effects within each category with two-sided Fisher's exact  
827 tests.

828

### 829 **Luciferase gene reporter assays**

830 We selected fine-mapped T2D risk variants with deltaSVM predictions (rs7482891, rs34584161,  
831 rs17712208, rs78840640, rs4679370) to test for allelic differences in enhancer activity in MIN6  
832 beta cells using luciferase reporter assays. We cloned sequences containing reference alleles in  
833 the forward orientation upstream of the minimal promoter of firefly luciferase vector pGL4.23  
834 (Promega) using KpnI and SacI restriction sites. For rs7482891 (*TH*) and rs34584161 (*RNF6*),  
835 we cloned alternative alleles in the forward direction in the same manner as the reference alleles.  
836 For rs17712208 (*PROX-AS1*), rs78840640 (*IGF2BP3*), and rs4679370 (*SLC12A8*), we  
837 introduced the alternative alleles via site-directed mutagenesis (SDM) using the NEB Q5 Site-  
838 Directed Mutagenesis kit (New England Biolabs). We designed primers using NEBaseChanger  
839 (v.1.2.8), and we used 10ng of the reporter plasmid containing the reference allele as a template  
840 in site-directed mutagenesis using Q5 Hot Start High-Fidelity master mix (New England Biolabs).  
841 4uL of the SMD PCR product was treated with KLD mix (New England Biolabs) and transformed  
842 into DH5a *E. coli*. We miniprepmed plasmids using the Qiaprep Spin Mini kit (Qiagen) and verified  
843 plasmid sequences through Sanger sequencing with the RV3 primer.

844

845 SDM primers:

846

847 rs17712208 (*PROX-AS1*)

848 SDM primer (left): GGAGCTATGGaTAATTATTGACTG

849 SDM primer (right): ATTAACGATCCAGTCAGC

850

851 rs78840640 (*IGF2BP3*)

852 SDM primer (left): ATCAGATTTGgTGAGAAAGAAGAAC

853 SDM primer (right): GCCCATCAATTCTGAGCATG

854

855 rs4679370 (*SLC12A8*)

856 SDM primer (left): ATCAGTAAGCcCCTAAAGCCTG

857 SDM primer (right): TAACTTGAGGCAATGGTG

858

859 Construct primers:

860

861 rs7482891 (*TH*)

862 construct primer (left): AGAGGTCTGAGGAGCCCTTG

863 construct primer (right): TAGACCCTGCAGAGCCACAG

864

865 rs34584161 (*RNF6*)

866 construct primer (left): AAGCTGACAGACAGAGGGTCA

867 construct primer (right): GGGCTTCATAAACATCAGCA

868

869 rs17712208 (*PROX-AS1*)

870 construct primer (left): AAGCCACCTTCGTAAACAT

871 construct primer (right): TGAAGTAGCTCCCAGTGAAGG

872

873 rs78840640 (*IGF2BP3*)

874 construct primer (left): CACAATGAAGCCATGTCCTTT

875 construct primer (right): TCAGCTTTCTATTTTGGGGAAA

876

877 rs4679370 (*SLC12A8*)

878 construct primer (left): TCAATGTCTACCTCAAATTCTTTGT

879 construct primer (right): CACTGCAGCCTTAAACTCCTG

880

881 We seeded MIN6 cells into 6 (or 12)-well trays at 1 million cells per well. At 80% confluency, we

882 co-transfected cells with 500ng of the experimental firefly luciferase vector pGL4.23 containing

883 the alternative allele, reference allele, or an empty vector and 50ng of the vector pRL-SV40

884 (Promega) using the Lipofectamine 3000 reagent (Thermo Fisher). We performed all transfections

885 were performed in triplicate. Six hours after transfection, we replaced MIN6 growth media

886 consisting of modified DMEM containing 1.5g/L sodium bicarbonate supplemented with 4% heat

887 inactivated FBS, gentamicin, and 50uM beta-mercaptoethanol. We lysed cells 48 hours after

888 transfection and assayed for Firefly and Renilla luciferase activities using the Dual-Luciferase  
889 Reporter system (Promega). We normalized Firefly activity to Renilla activity and compared it to  
890 the empty vector, and normalized results were expressed as fold change compared to empty  
891 vector control per allele. We used a two-sided Student's T-test to compare the luciferase activity  
892 between the two alleles.

893

#### 894 **TF motif enrichment within predicted effect variant categories**

895 For each cell- or state-resolved category (hormone-high, hormone-low, alpha, beta) of variants  
896 with predicted effects, we extracted 29 bp sequences (+/-14 bp around each SNP) corresponding  
897 to the higher or lower predicted effect allele. Here, we reasoned that extracting sequences for a  
898 larger window around SNPs would alleviate bias for the analysis against motifs with longer PWMs.  
899 We then used AME from the MEME suite<sup>110</sup> (v.4.12.0) to predict motif enrichment, using position  
900 weight matrices from the latest non-redundant motif library JASPAR 2018<sup>38</sup>. We used sequences  
901 from the higher effect allele as the test set and sequences from the lower effect allele as the  
902 background set. Because motif for TFs within the same structural family can potentially show  
903 similar enrichment, we used the TFClass database (<http://tfclass.bioinf.med.uni-goettingen.de/>)  
904 to group motifs by TF family. To determine which TF was most likely driving the enrichment, we  
905 used min-max normalized promoter accessibility within TF family members with a promoter peak  
906 in alpha or beta cells and highlighted corresponding cell type patterns of promoter accessibility.

907

#### 908 **Enrichment of predicted variants for lower frequency variants**

909 We obtained genome-wide summary statistics of T2D from the DIAMANTE consortium<sup>10</sup>. We  
910 estimated LD patterns for variants with MAF<.05 using HRC imputed genotype data from samples  
911 in the UK Biobank (UKB, March 2018 release). We randomly selected 10,000 non-related UKB  
912 samples of European ancestry and calculated LD between lower frequency variants using PLINK  
913 (v.1.90b6.7). We then LD-pruned variants with MAF<.05 in DIAMANTE T2D data by first sorting  
914 variants based on their p-values and then removed variants in  $r^2 > .5$  with a more significant variant.  
915 Using the LD-pruned results, we then determined enrichment of variants with predicted effects on  
916 endocrine cell types. We created sets of variants that had significant effects (FDR<.1) in any  
917 endocrine cell type, as well as variants with FDR<.1 for each cell type. For alpha, beta and delta  
918 cells, we considered variants with effects in either cell state. We then created a background set  
919 of variants as those without significant effects in any endocrine cell type (all FDR>.1). We set a  
920 series of p-value thresholds ( $5 \times 10^{-8}$ ,  $1 \times 10^{-7}$ ,  $1 \times 10^{-6}$ ,  $1 \times 10^{-5}$ ,  $1 \times 10^{-4}$ ,  $1 \times 10^{-3}$ ), and at each threshold

921 determined the fraction of variants in each category as well as background variants reaching that  
922 p-value threshold to calculate a fold-enrichment based on these fractions compared to  
923 background. We determined significance of the enrichments by using a two-sided binomial test  
924 of the counts for each category using the background fraction as the expected count.

925

## 926 **Chromatin co-accessibility with Cicero**

927 We used Cicero<sup>6</sup> to calculate peak-peak co-accessibility scores for alpha and beta cells. Like the  
928 trajectory analysis, we started with a sparse binary matrix encoding overlap between the superset  
929 of islet regulatory peaks and cells. We extracted all cells belonging to alpha cell sub-clusters and  
930 filtered out peaks that were not present in alpha cells. We then used the `make_cicero_cds` function  
931 to aggregate cells based on the 50 nearest neighbors from the UMAP reduced dimensions. We  
932 then used Cicero to calculate co-accessibility scores using a window size of 1 Mb and a distance  
933 constraint of 500 kb, leaving other parameters at the default setting. We then repeated the same  
934 procedure for beta cells. We used two-sided Fisher's exact tests to assess whether distal co-  
935 accessible sites had higher accessibility in either hormone-high or -low states, and defined  
936 significance at  $FDR < .1$ . To compare promoter-distal co-accessibility links that had higher  
937 accessibility in the same direction (either both hormone-high or hormone-low), we used differential  
938 promoters between states (from the previous analysis in Figure 2).

939

## 940 **Enrichment of islet Hi-C and pHi-C loops in co-accessible peaks**

941 We obtained sets of merged Hi-C loops<sup>27</sup> and high-confidence promoter capture Hi-C (pHi-C)  
942 loops<sup>76</sup> from public datasets. For Hi-C loops, we used anchors directly from the loops. For pHi-  
943 C loops, we used a 5 kb window centered on the interaction point as the anchor. To compare  
944 alpha and beta cell co-accessibility with Hi-C, we then used direct overlap of alpha or beta cell  
945 peaks with anchors. For different binned thresholds of co-accessibility in .05 increments, we then  
946 calculated distance-matched odds ratios for co-accessible peaks containing Hi-C loops versus  
947 non-co-accessible peaks ( $co-accessibility < 0$ ). We then used two-sided Fisher's exact tests to  
948 assess significance. We repeated the procedure for high confidence pHi-C loops for both cell  
949 types.

950

951 **Annotating fine-mapped diabetes risk variants**

952 We annotated risk signals in compiled fine-mapping data for type 2 diabetes from the DIAMANTE  
953 consortium and Biobank Japan studies. For the Biobank Japan T2D GWAS, we constructed LD-  
954 based 99% genetic credible sets for main signals at 22 novel loci that were distinct from the  
955 DIAMANTE study. We used the East Asian subset of the 1000 Genomes Project to define credible  
956 set variants by taking all variants in at least low LD ( $r^2 > .1$ ) with the index variant in a 5 Mb window.  
957 We used effect size and standard error estimates to calculate Bayes factors for each variant. For  
958 each signal, we then calculated the posterior probability causal probability (PPA) that each variant  
959 drives the association by dividing its Bayes factor by the sum of Bayes factors for all variants in  
960 the signal's credible set. We then sorted each signal by descending PPA and retained variants  
961 that added up to a cumulative probability of .99 to derive 99% credible sets.

962 For each signal, we identified candidate casual variants that were both in the 99% credible set  
963 and had a posterior causal probability greater than .01. We intersected these candidate variants  
964 with accessible chromatin sites for each islet cell type and cell state, and then identified variants  
965 with predicted effects on the overlapping cell types/states. We finally annotated variants based  
966 on overlap with sites co-accessible to gene promoters. For target genes linked to diabetes risk  
967 variants we determined enriched gene sets using GSEA.

968

969 **Analysis of *INS* promoter 4C data**

970 We downloaded and re-analyzed published 4C data of the *INS* promoter for the beta cell line  
971 EndoC- $\beta$ H1<sup>77</sup> with 4C-ker<sup>111</sup>. We first created a reduced genome using 25 bp flanking sequences  
972 of BglIII cutting sites. For each of the 3 replicates, we then aligned reads to this reduced genome  
973 using bowtie2<sup>112</sup> (v.2.2.9) with the parameter "-N 0 -5 20". We then extracted counts for each  
974 fragment from the SAM file after removing self-ligated and undigested fragments, and we used  
975 the bedGraph files as input to the R.4Cker package. We generated normalized counts and called  
976 high interaction regions using the 'nearBaitAnalysis' function with the parameter 'k=10'.

977

978 **CRISPR/Cas9-mediated enhancer deletion**

979 H1 hESCs (WA01; purchased from WiCell; NIH registration number: 0043) were seeded onto  
980 Matrigel®-coated six-well plates at a density of 50,000 cells/cm<sup>2</sup> and maintained in mTeSR1  
981 media (StemCell Technologies) for 3-4 days with media changed daily. hESC research was

982 approved by the University of California, San Diego, Institutional Review Board and Embryonic  
983 Stem Cell Research Oversight Committee.

984 To generate clonal homozygous *KCNQ1* enhancer deletion hESC lines, two sgRNAs targeting  
985 the enhancer were designed and cloned into Px333-GFP, a modified version of Px333 (#64073,  
986 Addgene). The plasmid was transfected into H1 hESCs with XtremeGene 9 (Roche). 24 hours  
987 later, 5000 GFP<sup>+</sup> cells were sorted into a well of six-well plate. Individual colonies that emerged  
988 within 5-7 days after transfection were subsequently transferred manually into 48-well plates for  
989 expansion, genomic DNA extraction, PCR genotyping, and Sanger sequencing. sgRNA oligos  
990 and genotyping primers are listed below. For control clones, we transfected the Px333-GFP  
991 plasmid into H1 hESCs and subjected the cells to the same workflow as H1 hESCs transfected  
992 with sgRNAs.

993 sgRNA oligos:

994 KCNQ1\_sgRNA1-s: ACTGTCTGGGCCCATCTGCCA

995 KCNQ1\_sgRNA1-as: TGGTTGGATCTGTTGCGGGG

996 Genotyping primers:

997 Span-F: AGTGGGGCCATGAACAATAA

998 Span-R: GCCTGAGTTTCCGTGACTGT

999

### 1000 **Pancreatic differentiation of enhancer-deleted hESCs clones**

1001 hESCs were differentiated in a suspension-based format using rotational culture with some  
1002 modifications to a published protocol<sup>83</sup>. Undifferentiated hESCs were aggregated by preparing a  
1003 single cell suspension in mTeSR media (STEMCELL Technologies) at  $1 \times 10^6$  cells/mL and  
1004 overnight culture in six-well ultra-low attachment plates (Costar) with 5.5ml per well on an orbital  
1005 rotator (Innova2000, New Brunswick Scientific) at 100 rpm. The following day, undifferentiated  
1006 aggregates were washed in DMEM/F12 (VWR) and differentiated using a multistep protocol with  
1007 daily media changes and continued orbital rotation at either 100 rpm or at 108 rpm from days 8  
1008 to 28. In addition to 1% GlutaMAX™ (Gibco) and 15 mM (days 0-10) or 20 mM (days 11-28)  
1009 glucose, MCDB 131 media (Life Technologies) was supplemented with 0.5% (days 0-5) or 2%  
1010 (days 6-14) fatty acid-free BSA (Proliant), 1.5 g/L (days 0-5 and days 11-28) or 2.5 g/L (days 6-  
1011 10) NaHCO<sub>3</sub> (Sigma-Aldrich), and 0.25 mM (days 3-10) ascorbic acid (Sigma-Aldrich).

1012 Human Activin A, mouse Wnt3a, and human KGF were purchased from R&D Systems. Other  
1013 media components included ascorbic acid (Sigma-Aldrich), Insulin-Transferrin-Selenium-  
1014 Ethanolamine (ITS-X; Thermo Fisher Scientific), ZnSO<sub>4</sub> (Sigma-Aldrich), heparin (Sigma-Aldrich),  
1015 retinoic acid (RA) (Sigma-Aldrich), SANT-1 (Sigma-Aldrich), 3,3',5-Triiodo-L-thyronine (T3)  
1016 (Sigma-Aldrich), the protein kinase C activator TPB (EMD Chemicals), the BMP type 1 receptor  
1017 inhibitor LDN-193189 (Stemgent), the TGFβ type 1 activin like kinase receptor ALK5 inhibitor,  
1018 ALK5 inhibitor II (Enzo Life Sciences), N-Acetyl-L-cysteine (Sigma), R428 (SelleckChem), Trolox  
1019 (EMD Millipore), γ-secretase inhibitor XX (Calbiochem).

1020

1021 Day 0: MCDB 131, 100ng/mL Activin, 25ng/mL mouse Wnt3a

1022 Day 1 – Day 2: MCDB 131, 100ng/mL Activin A

1023 Day 3 – Day 5: MCDB 131, 50ng/mL KGF

1024 Day 6 – Day 7: MCDB 131, 50ng/mL KGF, 0.25 μM SANT-1, 1 μM RA 100 nM LDN-193189, 200  
1025 nM TPB, 0.5% ITS-X

1026 Day 8 – Day 10: MCDB 131, 2ng/mL KGF, 0.25 μM SANT-1, 0.1 μM RA, 200 nM LDN-193189,  
1027 100 nM TPB, 0.5% ITS-X

1028 Day 11 – Day 13: MCDB 131, 0.25 μM SANT-1, 0.05 μM RA, 100 nM LDN-193189, 1 μM T3, 10  
1029 μM ALK5i II, 10 μM ZnSO<sub>4</sub>, 10 μg/mL heparin, 0.5% ITS-X

1030 Day 14 – Day 21: MCDB 131, 100 nM LDN-193189, 1 μM T3, 10 μM ALK5i II, 10 μM ZnSO<sub>4</sub>, 10  
1031 μg/mL heparin, 100nM γ-secretase inhibitor XX, 0.5% ITS-X

1032 Day 21 – Day 28: MCDB 131, 100 nM LDN-193189, 1 μM T3, 10 μM ALK5i II, 10 μM ZnSO<sub>4</sub>, 10  
1033 μg/mL heparin, 1mM N-Acetyl-L-cysteine, 10μM Trolox, 2μM R428 , 0.5% ITS-X

1034

### 1035 **Characterization of hESC-derived cultures at beta cell stage (day 28)**

#### 1036 *Flow cytometry analysis*

1037 hESC-derived cell aggregates were dissociated into a single-cell suspension with Accutase™  
1038 (Innovative Cell Technologies) at 37 °C for 5 min. Accutase™ was quenched with FACS buffer  
1039 (0.2% (w/v) BSA in PBS). Cells were then pelleted, fixed, and permeabilized with  
1040 Cytotfix/Cytoperm Fixation/Permeabilization Solution (BD Biosciences) for 20 min at 4 °C, and



1041 washed twice in BD Perm/Wash™ Buffer. We incubated cells with AF647-conjugated mouse anti-  
1042 Nkx6.1 (BD Biosciences) and PE-conjugated rabbit anti-INS (Cell Signaling Technology) antibody  
1043 in 50 µl BD Perm/Wash™ Buffer for 1 hour at 4 °C. Following three washes in BD Perm/Wash™  
1044 Buffer, cells were analyzed on a FACSCanto II (BD Biosciences) cytometer.

#### 1045 *Immunofluorescence staining and quantification of immunofluorescence signal*

1046 hESC-derived cell aggregates were washed twice with PBS and then fixed with 4%  
1047 paraformaldehyde in PBS for 30 min at room temperature. Following three washes in PBS,  
1048 aggregates were incubated in 30% sucrose at 4 °C overnight, frozen in Optimal Cutting  
1049 Temperature Compound (Sakura Finetek USA), and sectioned at 10 µm with a CM3050S cryostat  
1050 (Leica). Sections were washed with PBS, permeabilized, and blocked with  
1051 Permeabilization/Blocking Buffer for 1 h at room temperature. Primary and secondary antibodies  
1052 were diluted in Permeabilization/Blocking Buffer. We incubated sections overnight at 4°C with  
1053 primary antibodies, and then secondary antibodies for 30 min at room temperature. The following  
1054 primary antibodies were used: mouse anti-NKX6-1 (LifeSpan BioSciences, 1:250), guinea pig  
1055 anti-INS (Dako, 1:1000). Secondary antibodies (1:1000) were Cy3-, Alexafluor488-conjugated  
1056 antibodies raised in donkey against mouse and guinea pig (Jackson Immuno Research  
1057 Laboratories). We acquired images on a Zeiss Axio-Observer-Z1 microscope with a Zeiss  
1058 AxioCam digital camera.

#### 1059 *mRNA sequencing*

1060 For each clone, we collected aggregates from two independent batches of differentiation and  
1061 lysed them in RLT Buffer. We then extracted total RNA using the RNeasy Micro Kit (QIAGEN)  
1062 following the manufacturer's instructions. mRNA libraries were prepared using KAPA mRNA  
1063 Hyper Prep kit (KAPA) and single-end 75 bp reads were sequenced using HiSeq4000 (Illumina).  
1064 We used STAR (v2.5.3a) to map reads to the hg19 genome, allowing for up to 10 mismatches.  
1065 We retained reads aligned uniquely to one genomic location for subsequent analysis. We then  
1066 created input count files for DESeq2 with htseq-count from the HTSeq python package (v.0.9.0)  
1067 and tested for differential gene expression using DESeq2 (v1.10.1) with default parameters, using  
1068 differentiation batch as a technical covariate in our analysis. We considered genes with an  
1069 FDR<.1 as significantly differentially expressed.

#### 1070 *Insulin content measurement*

1071 We washed hESC-derived cell aggregates with PBS, resuspended in 50µl of 0.1% SDS TE buffer  
1072 and sonicated for 3 cycles of 30 sec on/ 30 sec off each using a Bioruptor on the high setting. We

1073 then immersed the lysate in a solution of 2% HCl and 80% ethanol overnight at 4°C and  
1074 centrifuged at max speed for 10 min at 4°C. We collected the supernatant and measured insulin  
1075 content using a human insulin ELISA kit (ALPCO). We resuspended the pellets in 50µl TE buffer  
1076 and measured DNA content with Nanodrop, and normalized insulin content to DNA content.

1077

## 1078 **Figure Legends**

1079

### 1080 **Main Figures**

1081

1082 **Figure 1. Pancreatic islet cell type accessible chromatin defined using snATAC-seq.** (a)  
1083 Clustering of accessible chromatin profiles from 14,239 pancreatic islet cells identifies 13 distinct  
1084 clusters. Cells are plotted using the first two UMAP components, and clusters are assigned cell  
1085 type identities based on promoter accessibility of known marker genes for each cell type. (b)  
1086 Promoter accessibility in a 1 kb window around the TSS for selected endocrine and non-endocrine  
1087 marker genes for each profiled cell. A cell is colored if it had promoter accessibility for the marker  
1088 gene listed in the bottom right corner of each subplot, and otherwise is grey. (c) Genome browser  
1089 plots showing aggregate read density (scaled to uniform  $1 \times 10^5$  read depth, range: 1-10) for cells  
1090 within each cell type cluster at hormone gene loci for endocrine islet cell types: *GCG* (alpha), *INS-*  
1091 *IGF2* (beta), *SST* (delta), and *PPY* (gamma). The promoter region for each gene is highlighted,  
1092 and the number of cells for each cell type cluster is listed in parenthesis. (d) Spearman correlation  
1093 between t-statistics of marker genes based on promoter accessibility (snATAC-seq) or gene  
1094 expression (scRNA-seq) using the top 100 most specific gene promoters from each islet snATAC-  
1095 seq cluster. (e) Normalized chromVAR motif enrichment values for 111 TF sequence motifs that  
1096 have variable activity across clusters. We collapsed multiple clusters for each cell type into a  
1097 single cluster (e.g. combining beta 1 and beta 2 into a single beta cell cluster). Subtype-specific  
1098 motif enrichment is presented in Figure 2. Position weight matrices and names are shown for  
1099 sequence motifs for TF families enriched across different endocrine and non-endocrine cell types.  
1100 Enrichment z-scores for FOXA1 and PDX1 motifs in each cell are projected onto UMAP  
1101 coordinates to the right of the main heatmap.

1102

1103 **Figure 2. Heterogeneity in alpha and beta cell accessible chromatin and regulatory**  
1104 **programs.** (a) Gene promoters with significantly differential chromatin accessibility between sub-

1105 clusters of alpha cells (left) and beta cells (right). Genes with increased promoter accessibility in  
1106 alpha 1 ( $GCG^{high}$ ) and beta 1 ( $INS^{high}$ ) sub-clusters include *GCG* (glucagon) for alpha cells and  
1107 *INS* (insulin) for beta cells, as well as genes such as *ABCC8*, *G6PC2*, *GCK* and *SLC30A8*.  
1108 Conversely, genes with increased promoter accessibility in alpha 2 ( $GCG^{low}$ ) and beta 2 ( $INS^{low}$ )  
1109 sub-clusters include genes such as *FOSL1*, *FOSL2*, and *ATF3*. (b) Genes with increased  
1110 promoter accessibility in the hormone-high ( $INS^{high}$ ,  $GCG^{high}$ ) or hormone-low ( $INS^{low}$ ,  $GCG^{low}$ )  
1111 state of one cell type were significantly enriched for genes with increased hormone-high or  
1112 hormone-low activity in the other cell type, respectively (left); Genes with differential promoter  
1113 accessibility across alpha and beta cell states were enriched for genes in beta cell subsets ( $\beta$  sub.  
1114 1-4) previously identified in an islet single cell gene expression study. (right) \*\*FDR<.01,  
1115 \*FDR<.10. (c) Gene ontology terms for biological processes related to glucose response and  
1116 hormone secretion were enriched in genes with higher promoter accessibility in  $INS^{high}$  and  
1117  $GCG^{high}$  cells, whereas terms for stress response, insulin signaling and cell cycle were enriched  
1118 in genes with higher promoter accessibility in  $INS^{low}$  and  $GCG^{low}$  cells. (d) Row-normalized  
1119 chromVAR enrichments for 111 TF motifs showing variable enrichment across alpha or beta cells.  
1120 We observed motifs enriched for different sub-clusters including RFX family members (RFX2-5)  
1121 for  $GCG^{high}$  alpha and  $INS^{high}$  beta cells, and FOS/JUN family members for  $GCG^{low}$  alpha and  
1122  $INS^{low}$  beta cells. Individual cell enrichment z-scores of a representative RFX (RFX3) and  
1123 FOS/JUN (FOS::JUN) motif are plotted on UMAP coordinates, and the violin plots below each  
1124 UMAP plot show enrichment values (median: center line, boxplot limits: quartiles) within each  
1125 alpha and beta state. (e) Ordering of alpha and beta cells on a trajectory using high *GCG/INS-*  
1126 *IGF2* promoter accessibility as the anchor point with Cicero. Plots show cells binned across this  
1127 trajectory from left to right, where the top shows the percentage of cells in the hormone-high state  
1128 in a given bin, colored bars above the heatmap represent individual cells with their binary clusters  
1129 in their positions across each trajectory, and the heatmap shows chromVAR enrichments for  
1130 motifs in bins across each trajectory. (f) Motifs in the FOS/JUN family show increasing enrichment  
1131 across the alpha and beta cell trajectory. Genes in the FOS/JUN family with promoter accessibility  
1132 patterns that match the motif enrichment patterns (Spearman correlation>.9) are highlighted (in  
1133 blue and starred).

1134

1135 **Figure 3. Enrichment of islet single cell accessible chromatin for diabetes and related trait**  
1136 **genetic association data.** (a) Cell type specific LD score regression enrichment z-scores for  
1137 diabetes-related quantitative endophenotypes (top), type 1 and 2 diabetes (middle), and control

1138 traits (bottom) for islet snATAC-seq clusters. \*\*FDR<.01 \*FDR<.1. (b) Single cell enrichment z-  
1139 scores for fasting glucose level, type 2 diabetes, major depressive disorder, and lupus projected  
1140 onto UMAP coordinates (left panels), boxplot showing z-score enrichment distribution per cell  
1141 type and state (middle panels), and z-score enrichment distribution split into 10 bins based on  
1142 beta cell trajectory value (right panels). All boxplots show median (center line) and upper and  
1143 lower quartiles (box limits). (c) Genome browser shot of the *DGKB* locus which is associated with  
1144 both type 2 diabetes and fasting glucose level. Candidate causal variants fall in an enhancer with  
1145 higher accessibility in INS<sup>high</sup> beta cells and with dynamic chromatin accessibility decreasing  
1146 across the beta cell trajectory, consistent with the beta cell enrichment patterns for fasting glucose  
1147 level. (d) Correlation between single cell fasting glucose (FG) level enrichments and TF motif  
1148 enrichments from chromVAR across all 14.2k cells (left) and 7.2k beta cells (right). Across all  
1149 cells, FG level is positively correlated with beta cell TF motifs such as PDX1 and NKX6-1 and  
1150 negatively correlated with alpha cell TF motifs such as GATA. Within beta cells, FG level is  
1151 positively correlated with TF motifs enriched in the INS<sup>high</sup> state such as RFX, NRL/MAF, and  
1152 FOXA, and negatively correlated with TF motifs enriched in the INS<sup>low</sup> state such as JUND and  
1153 NFE2.

1154

1155 **Figure 4. Genetic variants with islet cell type- and state-specific effects on chromatin**  
1156 **accessibility.** (a) Percentage of HRC reference panel r1.1 variants in any endocrine cell type  
1157 peak (n=1,411,387 total) that had significant deltaSVM predictions at FDR<.1 for the reference  
1158 (ref) or alternate (alt) allele in different endocrine cell types and states. (b) Spearman correlation  
1159 comparing deltaSVM score to chromatin accessibility allelic imbalance z-scores using variants  
1160 with significant deltaSVM predictions for alpha and beta states. (c) Luciferase gene reporter  
1161 assays of five fine-mapped T2D variants with predicted beta cell effects in MIN6 cells. All tested  
1162 variants (n=3) had significant effects in gene reporter assays and were directionally consistent  
1163 with deltaSVM effects (highlighted with a circle around the allele with higher predicted effect).  
1164 Data shown are mean ± 95% confidence interval. Two-sided Student's T-test \*P<.05 \*\*P<.01  
1165 \*\*\*P<.001. (d) Enrichment of ensemble islet caQTLs for SNPs with significant deltaSVM effects  
1166 in alpha and beta cells (left) and categorized based on shared, cell type- and state-specific  
1167 deltaSVM effects on alpha and beta cells (right). Two-sided Fisher's exact test. ns, not significant.  
1168 (e) Variants with predicted cell type- and state-specific effects on alpha and beta cells, where size  
1169 indicates magnitude of the deltaSVM z-score and color indicates the effect allele. Ref=blue,  
1170 alt=red (left). TF motif families enriched in sequences surrounding the effect allele compared to

1171 the non-effect allele for each variant category (middle). Promoter accessibility patterns of genes  
1172 in in enriched TF motif families. TFs with promoter accessibility patterns that match TF motif  
1173 enrichment patterns are highlighted in blue and starred (right). (f) Enrichment of low frequency  
1174 and rare variants with significant effects on islet chromatin for T2D association at different p-value  
1175 thresholds. Data shown are enrichment  $\pm$  95% confidence interval. Two-sided binomial test  
1176 \* $P < .05$ . (g) Low-frequency T2D-associated variant rs78840640 at the *IGF2BP3* signal has a high  
1177 causal probability (PPA=0.33), overlaps peaks in both beta cell states, and is predicted to have  
1178 allelic effects in beta cells.

1179 **Figure 5. Chromatin co-accessibility links cell type enhancers and diabetes risk variants**  
1180 **to target genes.** (a) Distance-matched odds that beta cell co-accessibility links overlap islet pChI-  
1181 C chromatin loops at different co-accessibility threshold bins. (b) Beta cell (top) and alpha cell  
1182 (middle) co-accessibility between pairs of accessible chromatin sites and high-confidence  
1183 promoter capture Hi-C interactions from bulk islets (bottom) anchored at the *PDX1* promoter. (c)  
1184 Beta cell co-accessibility anchored on an enhancer within *KCNQ1* harboring causal T2D variant  
1185 rs231361 (PPA=1) shows distal links to the *INS* promoter as well as other non-promoter sites.  
1186 This enhancer has an accessible peak call in the  $INS^{high}$  beta cell state but not the  $INS^{low}$  state  
1187 and has dynamic accessibility across the beta cell state trajectory. rs231361 disrupts a sequence  
1188 motif for *RFX*, which itself is enriched in  $INS^{high}$  beta cells, has dynamic enrichment across the  
1189 beta cell trajectory, and is predicted to have allelic effects on  $INS^{high}$  beta cells (deltaSVM z-score  
1190 \* $FDR < .1$ ). We performed CRISPR/Cas9-mediated deletion of the 2.6 kb genomic region flanking  
1191 this enhancer (highlighted in grey) in hESCs (*KCNQ1 $\Delta$ Enh*). (d) Differential expression analysis of  
1192 genes within 2 Mb of the *KCNQ1* enhancer in beta cell stage cultures (day 28) from *KCNQ1 $\Delta$ Enh*  
1193 (n=6; 3 clones each differentiated two times) and control (n=2; 1 clone differentiated two times)  
1194 hESC clones. *INS* and *CDKN1C* mRNA levels are significantly reduced in *KCNQ1 $\Delta$ Enh* compared  
1195 to control cells, while other genes in the region show no significant difference in expression. Data  
1196 are shown as transcripts per million (TPM). (e) Representative immunofluorescence staining for  
1197 *INS* (green) and *NKX6-1* (red) with DAPI staining (blue) on beta cell stage *KCNQ1 $\Delta$ Enh* and control  
1198 aggregates. Scale bar, 50 $\mu$ m. (f) Histogram showing *INS* fluorescence intensity by flow cytometry  
1199 (left panel) and quantification of *INS* median fluorescence intensity (MFI, right panel) in beta cell  
1200 stage cultures from *KCNQ1 $\Delta$ Enh* (n=9; 3 clones each differentiated three times) and control (n=6;  
1201 2 clones each differentiated three times) cells. (g) Insulin content in beta cell stage cultures from  
1202 *KCNQ1 $\Delta$ Enh* (n=9; 3 clones each differentiated three times) and control (n=6; 2 clones

1203 differentiated three times) clones. Data are shown as mean  $\pm$  SEM. \*  $p < 0.05$ , \*\*\*  $p < 0.001$ , ns,  
1204 not significant by two-sided Student's T-test.

1205

## 1206 **Acknowledgements**

1207

1208 This work was supported by NIH R01DK114650 and U01DK105554 (sub-award) to K.G.,  
1209 R01DK068471 and U01DK105541 to M.S., U01DK120429 to K.G. and M.S., and by the UC San  
1210 Diego School of Medicine to the Center for Epigenomics. Data from the UK Biobank was accessed  
1211 under application 24058. We thank Ileana Matta for preparation of RNA-seq libraries.

1212

## 1213 **Conflict of Interest**

1214

1215 The authors have no conflict of interest to disclose.

1216

## 1217 **Author Contributions**

1218

1219 K.J.G., D.U.G, and M.Sa. conceived of and supervised the research in the study; K.J.G., D.U.G.,  
1220 M.Sa., J.C., C.Z, and Z.C. wrote the manuscript; J.C. performed analyses of single cell and  
1221 genetic data; C.Z., M.Sc and J.W. performed hESC experiments; Z.C. performed analyses of  
1222 single cell data; J.Y.H. performed single cell assays and genotyping; S.H., A.D. and M.O.  
1223 performed reporter experiments; Y.Q. performed analyses of 4C data; Y.Sui performed analyses  
1224 of hESC data; Y.Sun and P.K. developed and processed data for the epigenome database; R.F.  
1225 contributed analyses of single cell data; S.P. contributed to the development of single cell assays.

1226

## 1227 **Data Availability**

1228

1229 Processed data and annotations will be made available at [www.t2depiome.org](http://www.t2depiome.org), and raw  
1230 sequence data will be deposited in GEO prior to publication. All other source data are either  
1231 included in the study or available from the corresponding authors upon request.

1232



1233 **References**

1234

- 1235 1. Maurano, M. T. *et al.* Systematic Localization of Common Disease-Associated Variation in  
1236 Regulatory DNA. *Science* **337**, 1190–1195 (2012).
- 1237 2. Cusanovich, D. A. *et al.* Multiplex Single Cell Profiling of Chromatin Accessibility by  
1238 Combinatorial Cellular Indexing. *Science* **348**, 910–914 (2015).
- 1239 3. Buenrostro, J. D. *et al.* Single-cell chromatin accessibility reveals principles of regulatory  
1240 variation. *Nature* **523**, 486–490 (2015).
- 1241 4. Preissl, S. *et al.* Single-nucleus analysis of accessible chromatin in developing mouse  
1242 forebrain reveals cell-type-specific transcriptional regulation. *Nat. Neurosci.* **21**, 432–439  
1243 (2018).
- 1244 5. Cusanovich, D. A. *et al.* A Single-Cell Atlas of In Vivo Mammalian Chromatin Accessibility.  
1245 *Cell* **174**, 1309–1324.e18 (2018).
- 1246 6. Pliner, H. A. *et al.* Cicero Predicts cis-Regulatory DNA Interactions from Single-Cell  
1247 Chromatin Accessibility Data. *Mol. Cell* **71**, 858–871.e8 (2018).
- 1248 7. Litzénburger, U. M. *et al.* Single-cell epigenomic variability reveals functional cancer  
1249 heterogeneity. *Genome Biol.* **18**, 15 (2017).
- 1250 8. Buenrostro, J. D. *et al.* Integrated Single-Cell Analysis Maps the Continuous Regulatory  
1251 Landscape of Human Hematopoietic Differentiation. *Cell* **173**, 1535–1548.e16 (2018).
- 1252 9. Ulirsch, J. C. *et al.* Interrogation of human hematopoiesis at single-cell and single-variant  
1253 resolution. *Nat. Genet.* **51**, 683–693 (2019).
- 1254 10. Mahajan, A. *et al.* Fine-mapping type 2 diabetes loci to single-variant resolution using  
1255 high-density imputation and islet-specific epigenome maps. *Nat. Genet.* **50**, 1505–1513  
1256 (2018).

- 1257 11. Wood, A. R. *et al.* A Genome-Wide Association Study of IVGTT-Based Measures of  
1258 First-Phase Insulin Secretion Refines the Underlying Physiology of Type 2 Diabetes Variants.  
1259 *Diabetes* **66**, 2296–2309 (2017).
- 1260 12. Morris, A. P. *et al.* Large-scale association analysis provides insights into the genetic  
1261 architecture and pathophysiology of type 2 diabetes. *Nat. Genet.* **44**, 981–990 (2012).
- 1262 13. Dupuis, J. *et al.* New genetic loci implicated in fasting glucose homeostasis and their  
1263 impact on type 2 diabetes risk. *Nat. Genet.* **42**, 105–116 (2010).
- 1264 14. Thurner, M. *et al.* Integration of human pancreatic islet genomic data refines regulatory  
1265 mechanisms at Type 2 Diabetes susceptibility loci. *eLife* **7**,
- 1266 15. Fuchsberger, C. *et al.* The genetic architecture of type 2 diabetes. *Nature* **536**, 41–47  
1267 (2016).
- 1268 16. Gaulton, K. J. *et al.* Genetic fine mapping and genomic annotation defines causal  
1269 mechanisms at type 2 diabetes susceptibility loci. *Nat. Genet.* **47**, 1415–1425 (2015).
- 1270 17. Pasquali, L. *et al.* Pancreatic islet enhancer clusters enriched in type 2 diabetes risk-  
1271 associated variants. *Nat. Genet.* **46**, 136–143 (2014).
- 1272 18. Gaulton, K. J. *et al.* A map of open chromatin in human pancreatic islets. *Nat. Genet.* **42**,  
1273 255–259 (2010).
- 1274 19. van der Meulen, T. *et al.* Urocortin3 mediates somatostatin-dependent negative  
1275 feedback control of insulin secretion. *Nat. Med.* **21**, 769–776 (2015).
- 1276 20. Caicedo, A. Paracrine and autocrine interactions in the human islet: more than meets  
1277 the eye. *Semin. Cell Dev. Biol.* **24**, 11–21 (2013).
- 1278 21. DiGrucchio, M. R. *et al.* Comprehensive alpha, beta and delta cell transcriptomes reveal  
1279 that ghrelin selectively activates delta cells and promotes somatostatin release from  
1280 pancreatic islets. *Mol. Metab.* **5**, 449–458 (2016).
- 1281 22. Dorrell, C. *et al.* Human islets contain four distinct subtypes of  $\beta$  cells. *Nat. Commun.* **7**,  
1282 ncomms11756 (2016).

- 1283 23. Xin, Y. *et al.* Pseudotime Ordering of Single Human  $\beta$ -Cells Reveals States of Insulin  
1284 Production and Unfolded Protein Response. *Diabetes* db180365 (2018). doi:10.2337/db18-  
1285 0365
- 1286 24. Korsunsky, I. *et al.* Fast, sensitive, and accurate integration of single cell data with  
1287 Harmony. *bioRxiv* 461954 (2018). doi:10.1101/461954
- 1288 25. Bader, E. *et al.* Identification of proliferative and mature  $\beta$ -cells in the islets of  
1289 Langerhans. *Nature* **535**, 430–434 (2016).
- 1290 26. Liu, J. S. E. & Hebrok, M. All mixed up: defining roles for  $\beta$ -cell subtypes in mature islets.  
1291 *Genes Dev.* **31**, 228–240 (2017).
- 1292 27. Greenwald, W. W. *et al.* Pancreatic islet chromatin accessibility and conformation  
1293 defines distal enhancer networks of type 2 diabetes risk. *bioRxiv* 299388 (2018).  
1294 doi:10.1101/299388
- 1295 28. Varshney, A. *et al.* Genetic regulatory signatures underlying islet gene expression and  
1296 type 2 diabetes. *Proc. Natl. Acad. Sci. U. S. A.* **114**, 2301–2306 (2017).
- 1297 29. Khetan, S. *et al.* Type 2 Diabetes-Associated Genetic Variants Regulate Chromatin  
1298 Accessibility in Human Islets. *Diabetes* **67**, 2466–2477 (2018).
- 1299 30. Haghverdi, L., Lun, A. T. L., Morgan, M. D. & Marioni, J. C. Batch effects in single-cell  
1300 RNA-sequencing data are corrected by matching mutual nearest neighbors. *Nat. Biotechnol.*  
1301 **36**, 421–427 (2018).
- 1302 31. Segerstolpe, Å. *et al.* Single-Cell Transcriptome Profiling of Human Pancreatic Islets in  
1303 Health and Type 2 Diabetes. *Cell Metab.* **24**, 593–607 (2016).
- 1304 32. Baron, M. *et al.* A Single-Cell Transcriptomic Map of the Human and Mouse Pancreas  
1305 Reveals Inter- and Intra-cell Population Structure. *Cell Syst.* **3**, 346–360.e4 (2016).
- 1306 33. George, D., Ahrens, P. & Lambert, S. Satellite glial cells represent a population of  
1307 developmentally arrested Schwann cells. *Glia* **66**, 1496–1506 (2018).

- 1308 34. Galvagni, F. *et al.* CD93 and dystroglycan cooperation in human endothelial cell  
1309 adhesion and migration. *Oncotarget* **7**, 10090–10103 (2016).
- 1310 35. Ackermann, A. M., Wang, Z., Schug, J., Naji, A. & Kaestner, K. H. Integration of ATAC-  
1311 seq and RNA-seq identifies human alpha cell and beta cell signature genes. *Mol. Metab.* **5**,  
1312 233–244 (2016).
- 1313 36. Arda, H. E. *et al.* A Chromatin Basis for Cell Lineage and Disease Risk in the Human  
1314 Pancreas. *Cell Syst.* **7**, 310–322.e4 (2018).
- 1315 37. Schep, A. N., Wu, B., Buenrostro, J. D. & Greenleaf, W. J. chromVAR: inferring  
1316 transcription-factor-associated accessibility from single-cell epigenomic data. *Nat. Methods*  
1317 **14**, 975–978 (2017).
- 1318 38. Khan, A. *et al.* JASPAR 2018: update of the open-access database of transcription  
1319 factor binding profiles and its web framework. *Nucleic Acids Res.* **46**, D1284 (2018).
- 1320 39. Wilson, M. E., Scheel, D. & German, M. S. Gene expression cascades in pancreatic  
1321 development. *Mech. Dev.* **120**, 65–80 (2003).
- 1322 40. Conrad, E. *et al.* The MAFB transcription factor impacts islet  $\alpha$ -cell function in rodents  
1323 and represents a unique signature of primate islet  $\beta$ -cells. *Am. J. Physiol. Endocrinol. Metab.*  
1324 **310**, E91–E102 (2016).
- 1325 41. Katoh, M. C. *et al.* MafB Is Critical for Glucagon Production and Secretion in Mouse  
1326 Pancreatic  $\alpha$  Cells In Vivo. *Mol. Cell. Biol.* **38**, (2018).
- 1327 42. Nishimura, W., Takahashi, S. & Yasuda, K. MafA is critical for maintenance of the  
1328 mature beta cell phenotype in mice. *Diabetologia* **58**, 566–574 (2015).
- 1329 43. Ozato, K., Taylor, P. & Kubota, T. The interferon regulatory factor family in host defense:  
1330 mechanism of action. *J. Biol. Chem.* **282**, 20065–20069 (2007).
- 1331 44. De Val, S. & Black, B. L. Transcriptional Control of Endothelial Cell Development. *Dev.*  
1332 *Cell* **16**, 180–195 (2009).

- 1333 45. Lawlor, N. *et al.* Single-cell transcriptomes identify human islet cell signatures and reveal  
1334 cell-type-specific expression changes in type 2 diabetes. *Genome Res.* **27**, 208–222 (2017).
- 1335 46. Bahrami, S. & Drabløs, F. Gene regulation in the immediate-early response process.  
1336 *Adv. Biol. Regul.* **62**, 37–49 (2016).
- 1337 47. Trapnell, C. *et al.* Pseudo-temporal ordering of individual cells reveals dynamics and  
1338 regulators of cell fate decisions. *Nat. Biotechnol.* **32**, 381 (2014).
- 1339 48. Wingender, E., Schoeps, T., Haubrock, M. & Dönitz, J. TFClass: a classification of  
1340 human transcription factors and their rodent orthologs. *Nucleic Acids Res.* **43**, D97-102  
1341 (2015).
- 1342 49. Ait-Lounis, A. *et al.* The transcription factor Rfx3 regulates beta-cell differentiation,  
1343 function, and glucokinase expression. *Diabetes* **59**, 1674–1685 (2010).
- 1344 50. Chandra, V. *et al.* RFX6 regulates insulin secretion by modulating Ca<sup>2+</sup> homeostasis in  
1345 human  $\beta$  cells. *Cell Rep.* **9**, 2206–2218 (2014).
- 1346 51. Piccand, J. *et al.* Rfx6 Maintains the Functional Identity of Adult Pancreatic  $\beta$  Cells. *Cell*  
1347 *Rep.* **9**, 2219–2232 (2014).
- 1348 52. Hindorff, L. A. *et al.* Potential etiologic and functional implications of genome-wide  
1349 association loci for human diseases and traits. *Proc. Natl. Acad. Sci. U. S. A.* **106**, 9362–  
1350 9367 (2009).
- 1351 53. Parker, S. C. J. *et al.* Chromatin stretch enhancer states drive cell-specific gene  
1352 regulation and harbor human disease risk variants. *Proc. Natl. Acad. Sci. U. S. A.* **110**,  
1353 17921–17926 (2013).
- 1354 54. Aylward, A., Chiou, J., Okino, M.-L., Kadakia, N. & Gaulton, K. J. Shared genetic risk  
1355 contributes to type 1 and type 2 diabetes etiology. *Hum. Mol. Genet.* (2018).  
1356 doi:10.1093/hmg/ddy314

- 1357 55. Strawbridge, R. J. *et al.* Genome-wide association identifies nine common variants  
1358 associated with fasting proinsulin levels and provides new insights into the pathophysiology  
1359 of type 2 diabetes. *Diabetes* **60**, 2624–2634 (2011).
- 1360 56. Manning, A. K. *et al.* A genome-wide approach accounting for body mass index identifies  
1361 genetic variants influencing fasting glycemic traits and insulin resistance. *Nat. Genet.* **44**,  
1362 659–669 (2012).
- 1363 57. Locke, A. E. *et al.* Genetic studies of body mass index yield new insights for obesity  
1364 biology. *Nature* **518**, 197–206 (2015).
- 1365 58. Saxena, R. *et al.* Genetic variation in GIPR influences the glucose and insulin responses  
1366 to an oral glucose challenge. *Nat. Genet.* **42**, 142–148 (2010).
- 1367 59. Wheeler, E. *et al.* Impact of common genetic determinants of Hemoglobin A1c on type 2  
1368 diabetes risk and diagnosis in ancestrally diverse populations: A transethnic genome-wide  
1369 meta-analysis. *PLoS Med.* **14**, e1002383 (2017).
- 1370 60. Hou, L. *et al.* Genome-wide association study of 40,000 individuals identifies two novel  
1371 loci associated with bipolar disorder. *Hum. Mol. Genet.* **25**, 3383–3394 (2016).
- 1372 61. Schizophrenia Working Group of the Psychiatric Genomics Consortium. Biological  
1373 insights from 108 schizophrenia-associated genetic loci. *Nature* **511**, 421–427 (2014).
- 1374 62. de Lange, K. M. *et al.* Genome-wide association study implicates immune activation of  
1375 multiple integrin genes in inflammatory bowel disease. *Nat. Genet.* **49**, 256–261 (2017).
- 1376 63. Bentham, J. *et al.* Genetic association analyses implicate aberrant regulation of innate  
1377 and adaptive immunity genes in the pathogenesis of systemic lupus erythematosus. *Nat.*  
1378 *Genet.* **47**, 1457–1464 (2015).
- 1379 64. Jin, Y. *et al.* Genome-wide association studies of autoimmune vitiligo identify 23 new risk  
1380 loci and highlight key pathways and regulatory variants. *Nat. Genet.* **48**, 1418–1424 (2016).
- 1381 65. Cordell, H. J. *et al.* International genome-wide meta-analysis identifies new primary  
1382 biliary cirrhosis risk loci and targetable pathogenic pathways. *Nat. Commun.* **6**, 8019 (2015).



- 1383 66. Wray, N. R. *et al.* Genome-wide association analyses identify 44 risk variants and refine  
1384 the genetic architecture of major depression. *Nat. Genet.* **50**, 668–681 (2018).
- 1385 67. Lambert, J. C. *et al.* Meta-analysis of 74,046 individuals identifies 11 new susceptibility  
1386 loci for Alzheimer’s disease. *Nat. Genet.* **45**, 1452–1458 (2013).
- 1387 68. Finucane, H. K. *et al.* Partitioning heritability by functional annotation using genome-wide  
1388 association summary statistics. *Nat. Genet.* **47**, 1228–1235 (2015).
- 1389 69. Bulik-Sullivan, B. K. *et al.* LD Score regression distinguishes confounding from  
1390 polygenicity in genome-wide association studies. *Nat. Genet.* **47**, 291–295 (2015).
- 1391 70. Lee, D. *et al.* A method to predict the impact of regulatory variants from DNA sequence.  
1392 *Nat. Genet.* **47**, 955–961 (2015).
- 1393 71. 1000 Genomes Project Consortium *et al.* A global reference for human genetic variation.  
1394 *Nature* **526**, 68–74 (2015).
- 1395 72. Khetan, S. *et al.* Chromatin accessibility profiling uncovers genetic- and T2D disease  
1396 state-associated changes in cis-regulatory element use in human islets. *bioRxiv* 192922  
1397 (2017). doi:10.1101/192922
- 1398 73. Shlyueva, D., Stampfel, G. & Stark, A. Transcriptional enhancers: from properties to  
1399 genome-wide predictions. *Nat. Rev. Genet.* **15**, 272–286 (2014).
- 1400 74. Schmitt, A. D., Hu, M. & Ren, B. Genome-wide mapping and analysis of chromosome  
1401 architecture. *Nat. Rev. Mol. Cell Biol.* **17**, 743–755 (2016).
- 1402 75. Thurman, R. E. *et al.* The accessible chromatin landscape of the human genome. *Nature*  
1403 **489**, 75–82 (2012).
- 1404 76. Miguel-Escalada, I. *et al.* Human pancreatic islet 3D chromatin architecture provides  
1405 insights into the genetics of type 2 diabetes. *bioRxiv* 400291 (2018). doi:10.1101/400291
- 1406 77. Jian, X. & Felsenfeld, G. Insulin promoter in human pancreatic  $\beta$  cells contacts diabetes  
1407 susceptibility loci and regulates genes affecting insulin metabolism. *Proc. Natl. Acad. Sci. U.*  
1408 *S. A.* **115**, E4633–E4641 (2018).

- 1409 78. Holmkvist, J. *et al.* The type 2 diabetes associated minor allele of rs2237895 KCNQ1  
1410 associates with reduced insulin release following an oral glucose load. *PLoS One* **4**, e5872  
1411 (2009).
- 1412 79. Jonsson, A. *et al.* A variant in the KCNQ1 gene predicts future type 2 diabetes and  
1413 mediates impaired insulin secretion. *Diabetes* **58**, 2409–2413 (2009).
- 1414 80. Tan, J. T. *et al.* Genetic Variation in KCNQ1 Associates With Fasting Glucose and  $\beta$ -Cell  
1415 Function. *Diabetes* **58**, 1445–1449 (2009).
- 1416 81. Yasuda, K. *et al.* Variants in KCNQ1 are associated with susceptibility to type 2 diabetes  
1417 mellitus. *Nat. Genet.* **40**, 1092–1097 (2008).
- 1418 82. Kanai, M. *et al.* Genetic analysis of quantitative traits in the Japanese population links  
1419 cell types to complex human diseases. *Nat. Genet.* **50**, 390–400 (2018).
- 1420 83. Rezania, A. *et al.* Reversal of diabetes with insulin-producing cells derived in vitro from  
1421 human pluripotent stem cells. *Nat. Biotechnol.* **32**, 1121–1133 (2014).
- 1422 84. Suzuki, K. *et al.* Identification of 28 new susceptibility loci for type 2 diabetes in the  
1423 Japanese population. *Nat. Genet.* **51**, 379–386 (2019).
- 1424 85. Claussnitzer, M. *et al.* FTO Obesity Variant Circuitry and Adipocyte Browning in  
1425 Humans. *N. Engl. J. Med.* **373**, 895–907 (2015).
- 1426 86. Fogarty, M. P., Cannon, M. E., Vadlamudi, S., Gaulton, K. J. & Mohlke, K. L.  
1427 Identification of a regulatory variant that binds FOXA1 and FOXA2 at the CDC123/CAMK1D  
1428 type 2 diabetes GWAS locus. *PLoS Genet.* **10**, e1004633 (2014).
- 1429 87. Rusu, V. *et al.* Type 2 Diabetes Variants Disrupt Function of SLC16A11 through Two  
1430 Distinct Mechanisms. *Cell* **170**, 199–212.e20 (2017).
- 1431 88. Carrat, G. R. *et al.* Decreased STARD10 Expression Is Associated with Defective Insulin  
1432 Secretion in Humans and Mice. *Am. J. Hum. Genet.* **100**, 238–256 (2017).
- 1433 89. Claussnitzer, M. *et al.* Leveraging cross-species transcription factor binding site patterns:  
1434 from diabetes risk loci to disease mechanisms. *Cell* **156**, 343–358 (2014).

- 1435 90. Roman, T. S. *et al.* A Type 2 Diabetes-Associated Functional Regulatory Variant in a  
1436 Pancreatic Islet Enhancer at the *Adcy5* Locus. *Diabetes* db170464 (2017). doi:10.2337/db17-  
1437 0464
- 1438 91. Kycia, I. *et al.* A Common Type 2 Diabetes Risk Variant Potentiates Activity of an  
1439 Evolutionarily Conserved Islet Stretch Enhancer and Increases *C2CD4A* and *C2CD4B*  
1440 Expression. *Am. J. Hum. Genet.* **102**, 620–635 (2018).
- 1441 92. Steck, A. K. & Rewers, M. J. Genetics of Type 1 Diabetes. *Clin. Chem.* **57**, 176–185  
1442 (2011).
- 1443 93. Yang, Y. & Chan, L. Monogenic Diabetes: What It Teaches Us on the Common Forms of  
1444 Type 1 and Type 2 Diabetes. *Endocr. Rev.* **37**, 190–222 (2016).
- 1445 94. Camunas-Soler, J. *et al.* Pancreas patch-seq links physiologic dysfunction in diabetes to  
1446 single-cell transcriptomic phenotypes. *bioRxiv* 555110 (2019). doi:10.1101/555110
- 1447 95. Avrahami, D., Klochendler, A., Dor, Y. & Glaser, B. Beta cell heterogeneity: an evolving  
1448 concept. *Diabetologia* **60**, 1363–1369 (2017).
- 1449 96. Picelli, S. *et al.* Tn5 transposase and tagmentation procedures for massively scaled  
1450 sequencing projects. *Genome Res.* **24**, 2033–2040 (2014).
- 1451 97. Li, H. & Durbin, R. Fast and accurate long-read alignment with Burrows-Wheeler  
1452 transform. *Bioinforma. Oxf. Engl.* **26**, 589–595 (2010).
- 1453 98. Li, H. *et al.* The Sequence Alignment/Map format and SAMtools. *Bioinforma. Oxf. Engl.*  
1454 **25**, 2078–2079 (2009).
- 1455 99. Wolf, F. A., Angerer, P. & Theis, F. J. SCANPY: large-scale single-cell gene expression  
1456 data analysis. *Genome Biol.* **19**, 15 (2018).
- 1457 100. Zhang, Y. *et al.* Model-based analysis of ChIP-Seq (MACS). *Genome Biol.* **9**, R137  
1458 (2008).
- 1459 101. ENCODE Project Consortium. An integrated encyclopedia of DNA elements in the  
1460 human genome. *Nature* **489**, 57–74 (2012).

- 1461 102. Quinlan, A. R. & Hall, I. M. BEDTools: a flexible suite of utilities for comparing genomic  
1462 features. *Bioinformatics* **26**, 841–842 (2010).
- 1463 103. Kuleshov, M. V. *et al.* Enrichr: a comprehensive gene set enrichment analysis web  
1464 server 2016 update. *Nucleic Acids Res.* **44**, W90-97 (2016).
- 1465 104. Subramanian, A. *et al.* Gene set enrichment analysis: a knowledge-based approach for  
1466 interpreting genome-wide expression profiles. *Proc. Natl. Acad. Sci. U. S. A.* **102**, 15545–  
1467 15550 (2005).
- 1468 105. Finucane, H. K. *et al.* Heritability enrichment of specifically expressed genes identifies  
1469 disease-relevant tissues and cell types. *Nat. Genet.* **50**, 621–629 (2018).
- 1470 106. Li, Y. I. *et al.* RNA splicing is a primary link between genetic variation and disease.  
1471 *Science* **352**, 600–604 (2016).
- 1472 107. McCarthy, S. *et al.* A reference panel of 64,976 haplotypes for genotype imputation. *Nat.*  
1473 *Genet.* **48**, 1279–1283 (2016).
- 1474 108. Das, S. *et al.* Next-generation genotype imputation service and methods. *Nat. Genet.* **48**,  
1475 1284–1287 (2016).
- 1476 109. van de Geijn, B., McVicker, G., Gilad, Y. & Pritchard, J. K. WASP: allele-specific  
1477 software for robust molecular quantitative trait locus discovery. *Nat. Methods* **12**, 1061–1063  
1478 (2015).
- 1479 110. Bailey, T. L. *et al.* MEME SUITE: tools for motif discovery and searching. *Nucleic Acids*  
1480 *Res.* **37**, W202-208 (2009).
- 1481 111. Raviram, R. *et al.* 4C-ker: A Method to Reproducibly Identify Genome-Wide Interactions  
1482 Captured by 4C-Seq Experiments. *PLoS Comput. Biol.* **12**, e1004780 (2016).
- 1483 112. Langmead, B. & Salzberg, S. L. Fast gapped-read alignment with Bowtie 2. *Nat.*  
1484 *Methods* **9**, 357–359 (2012).
- 1485

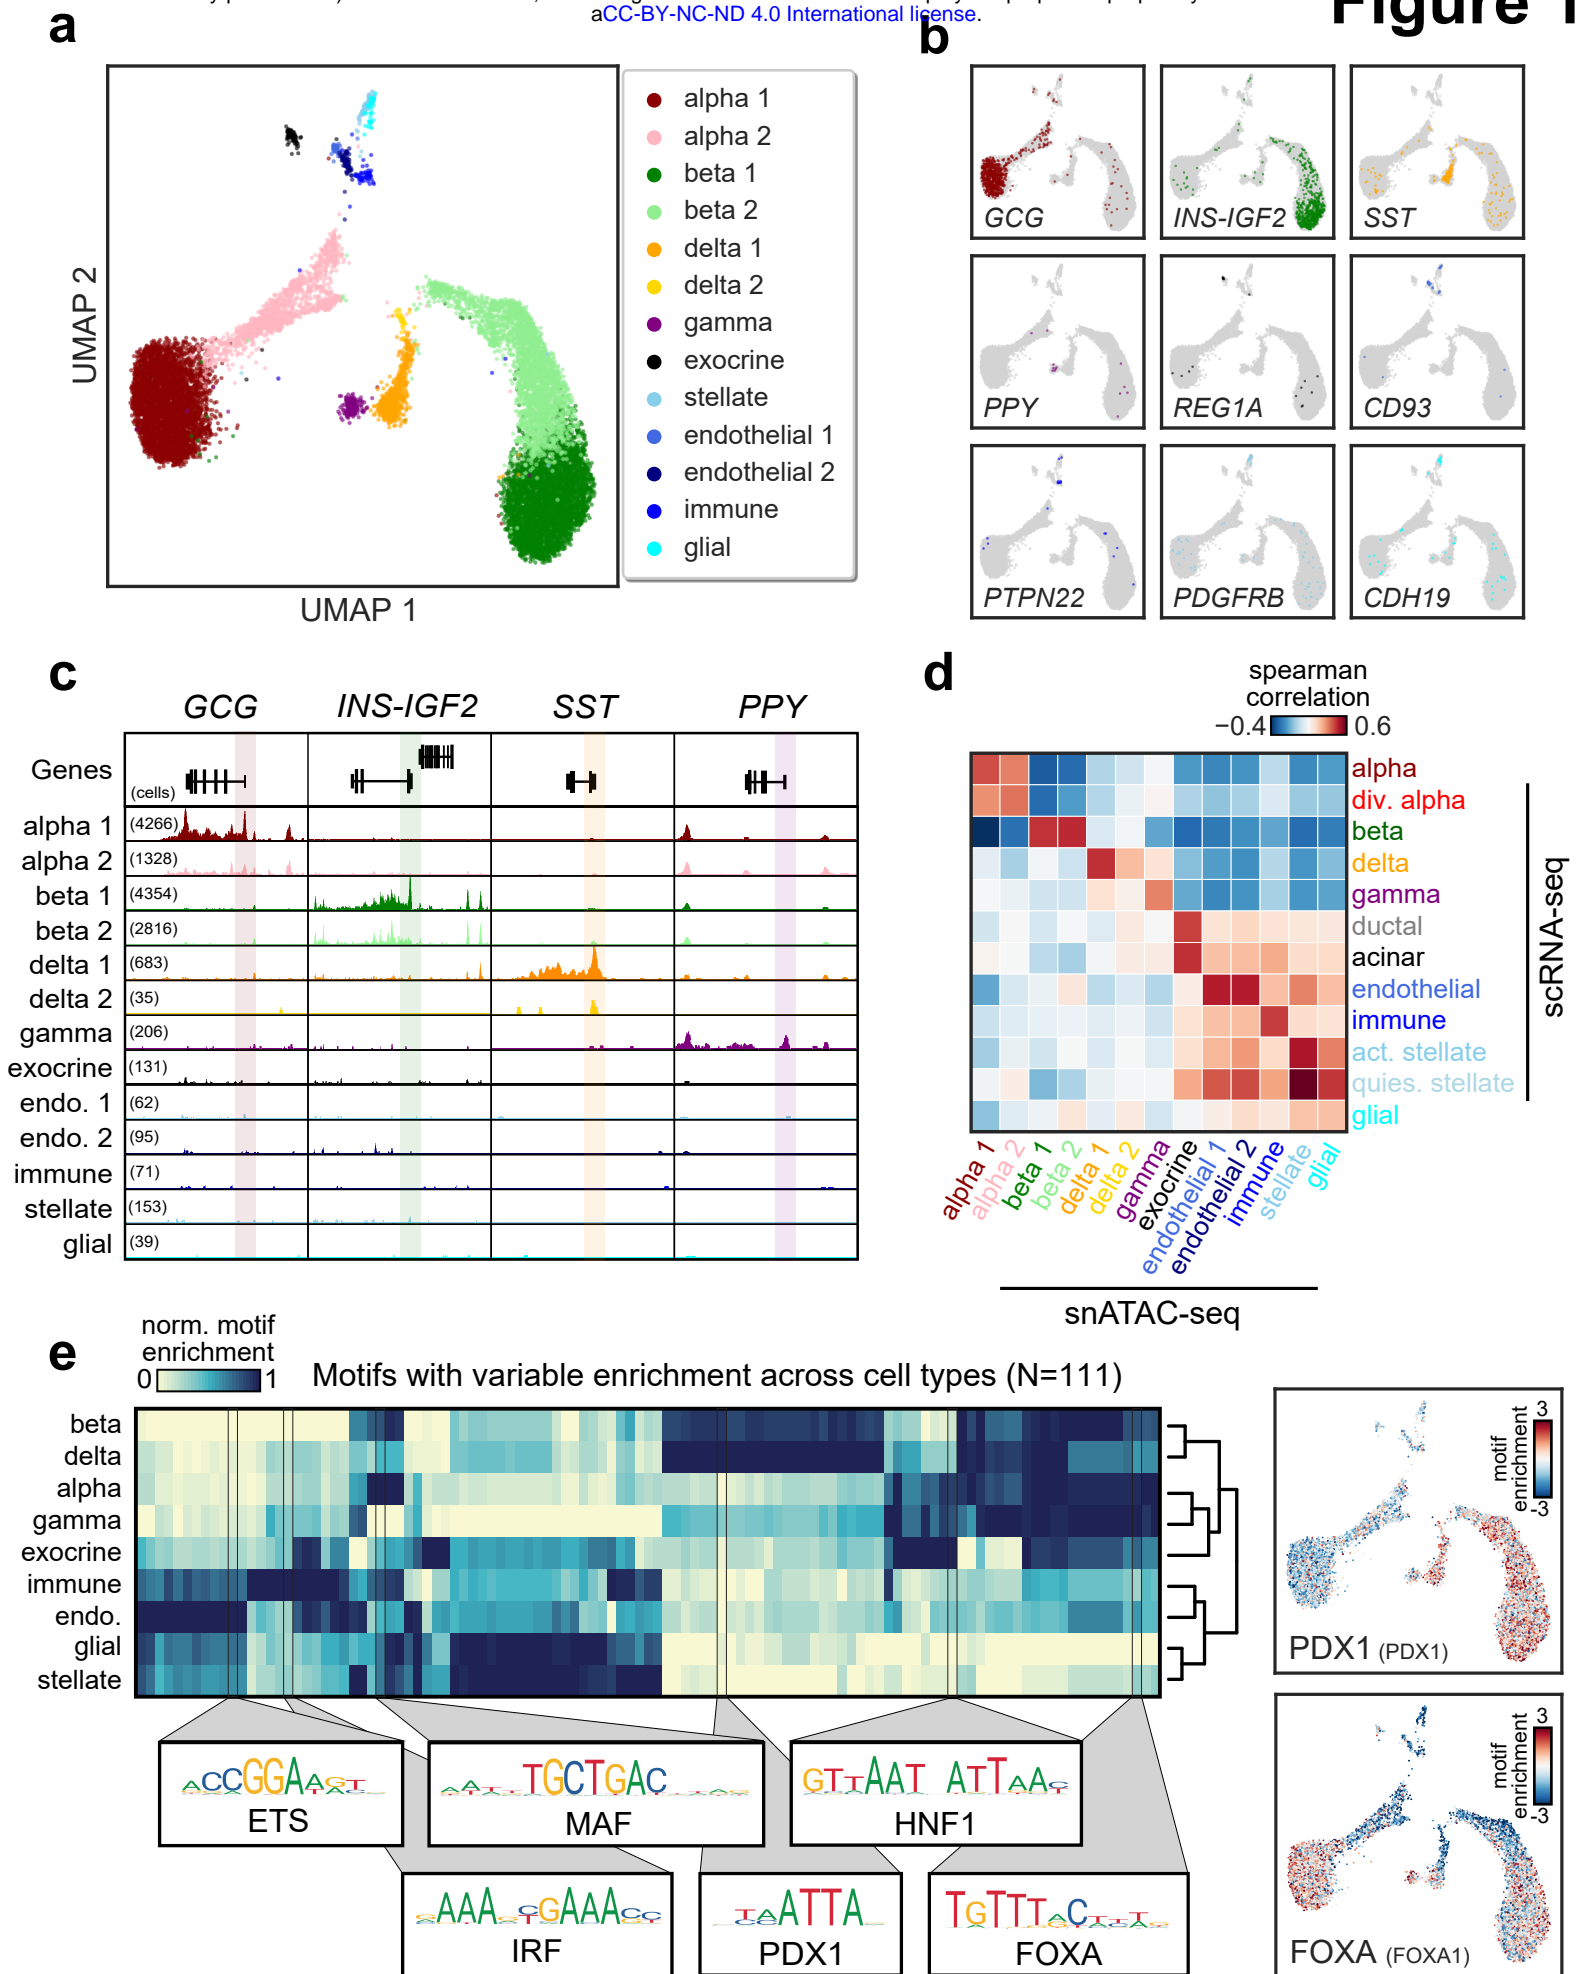

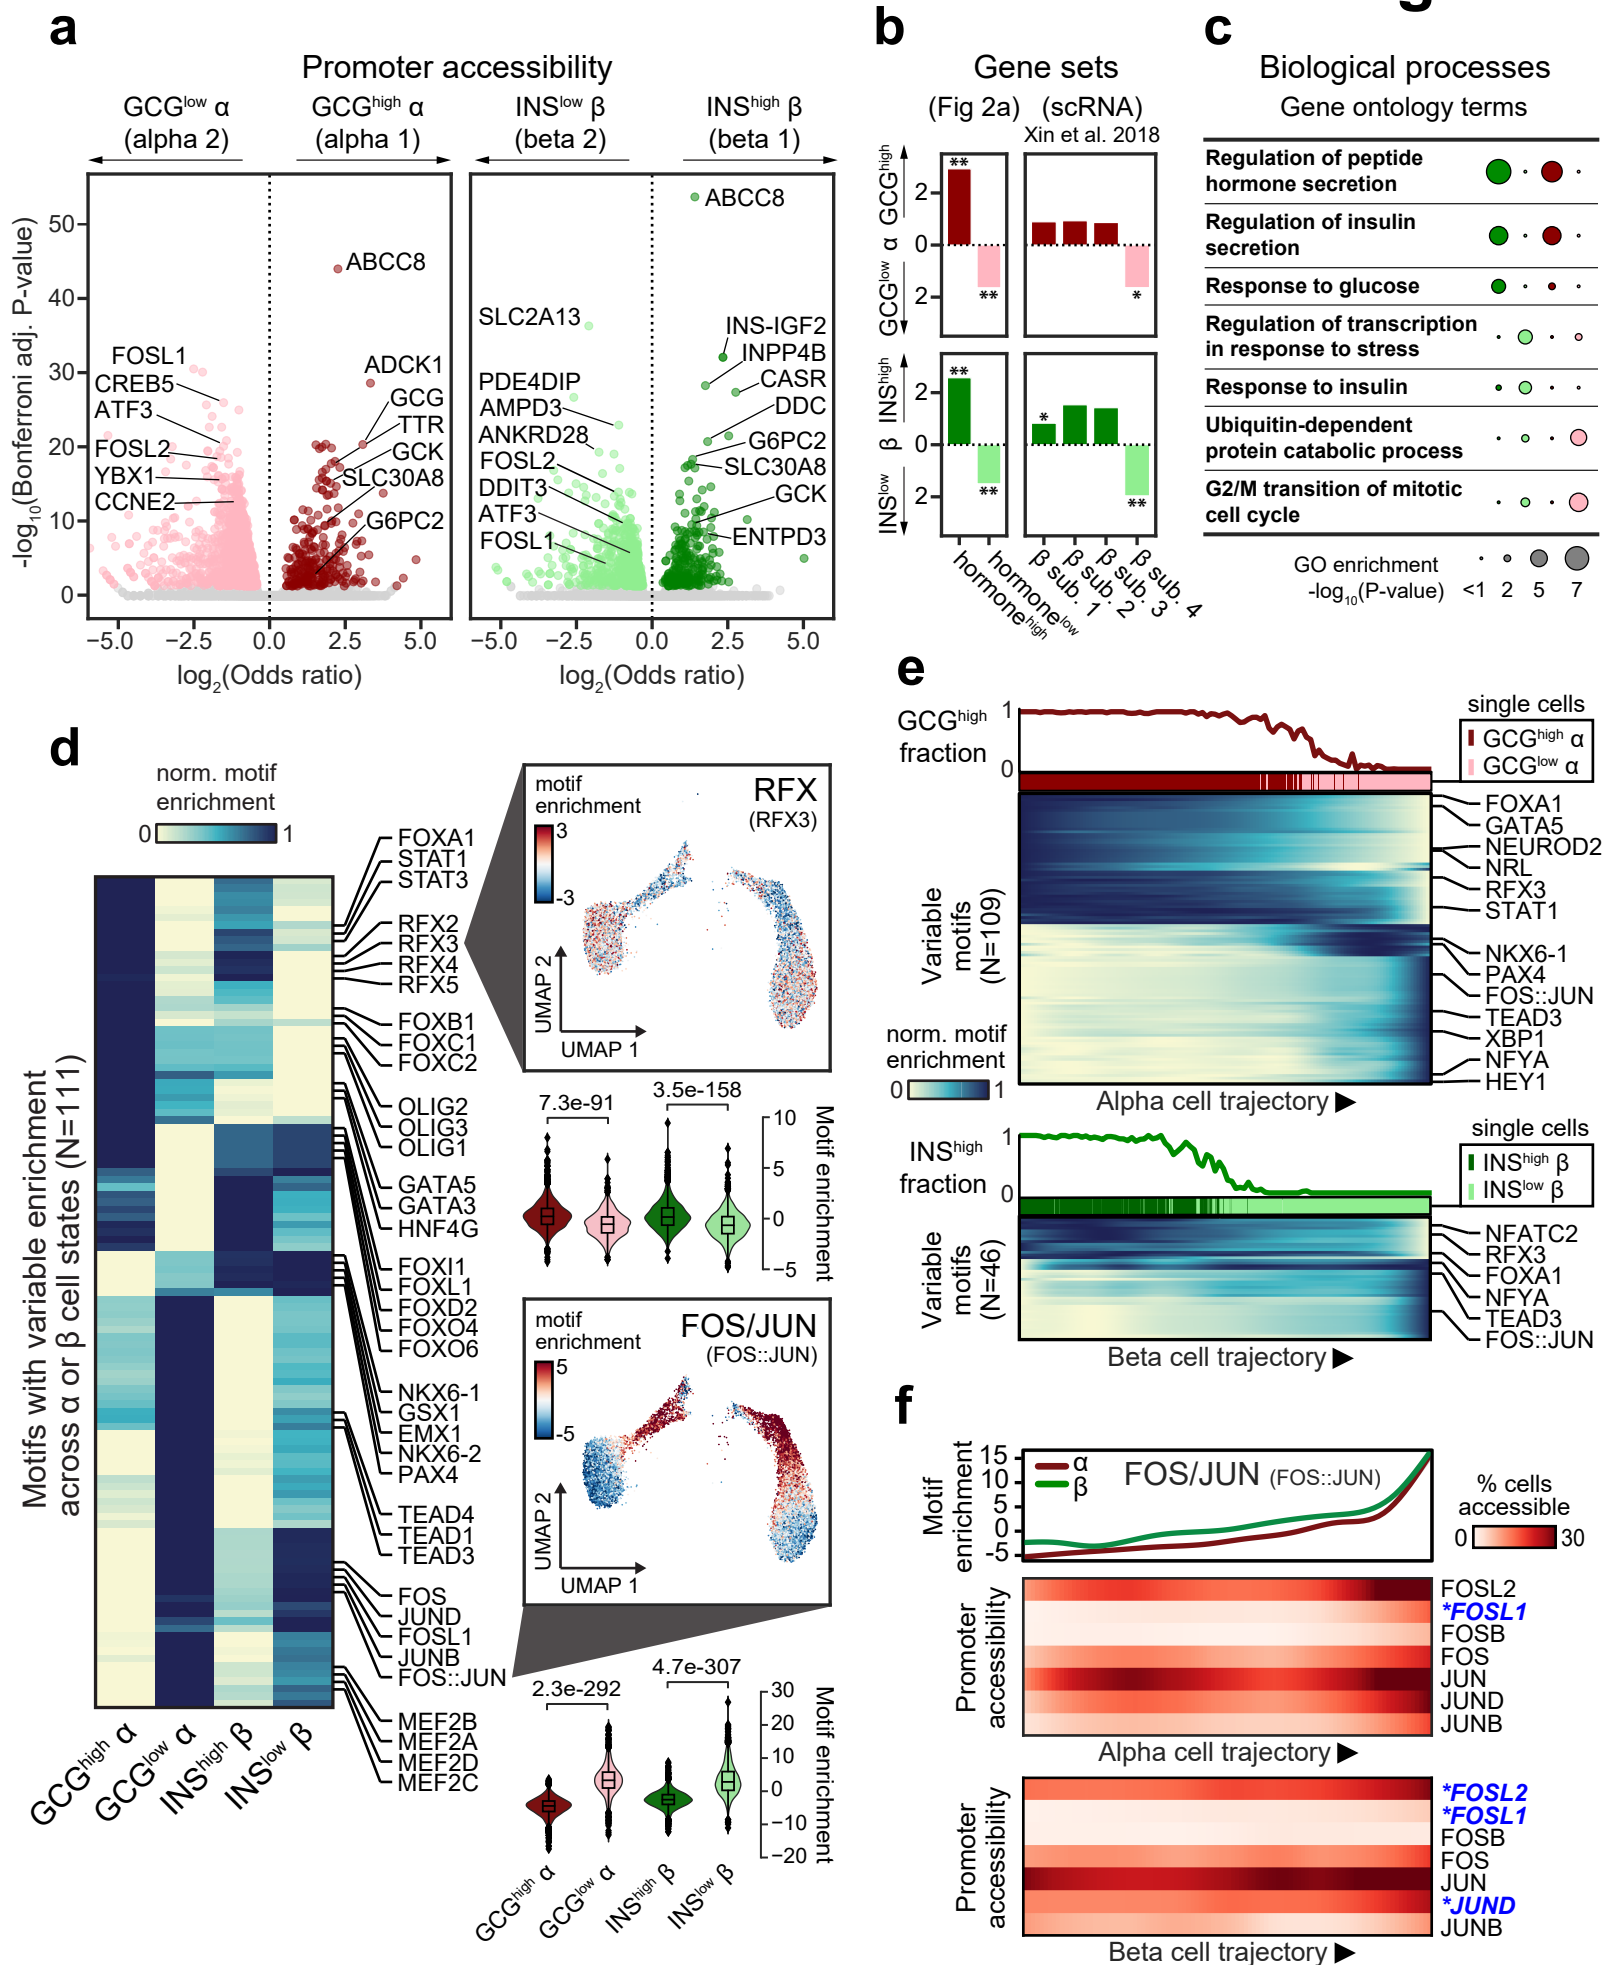



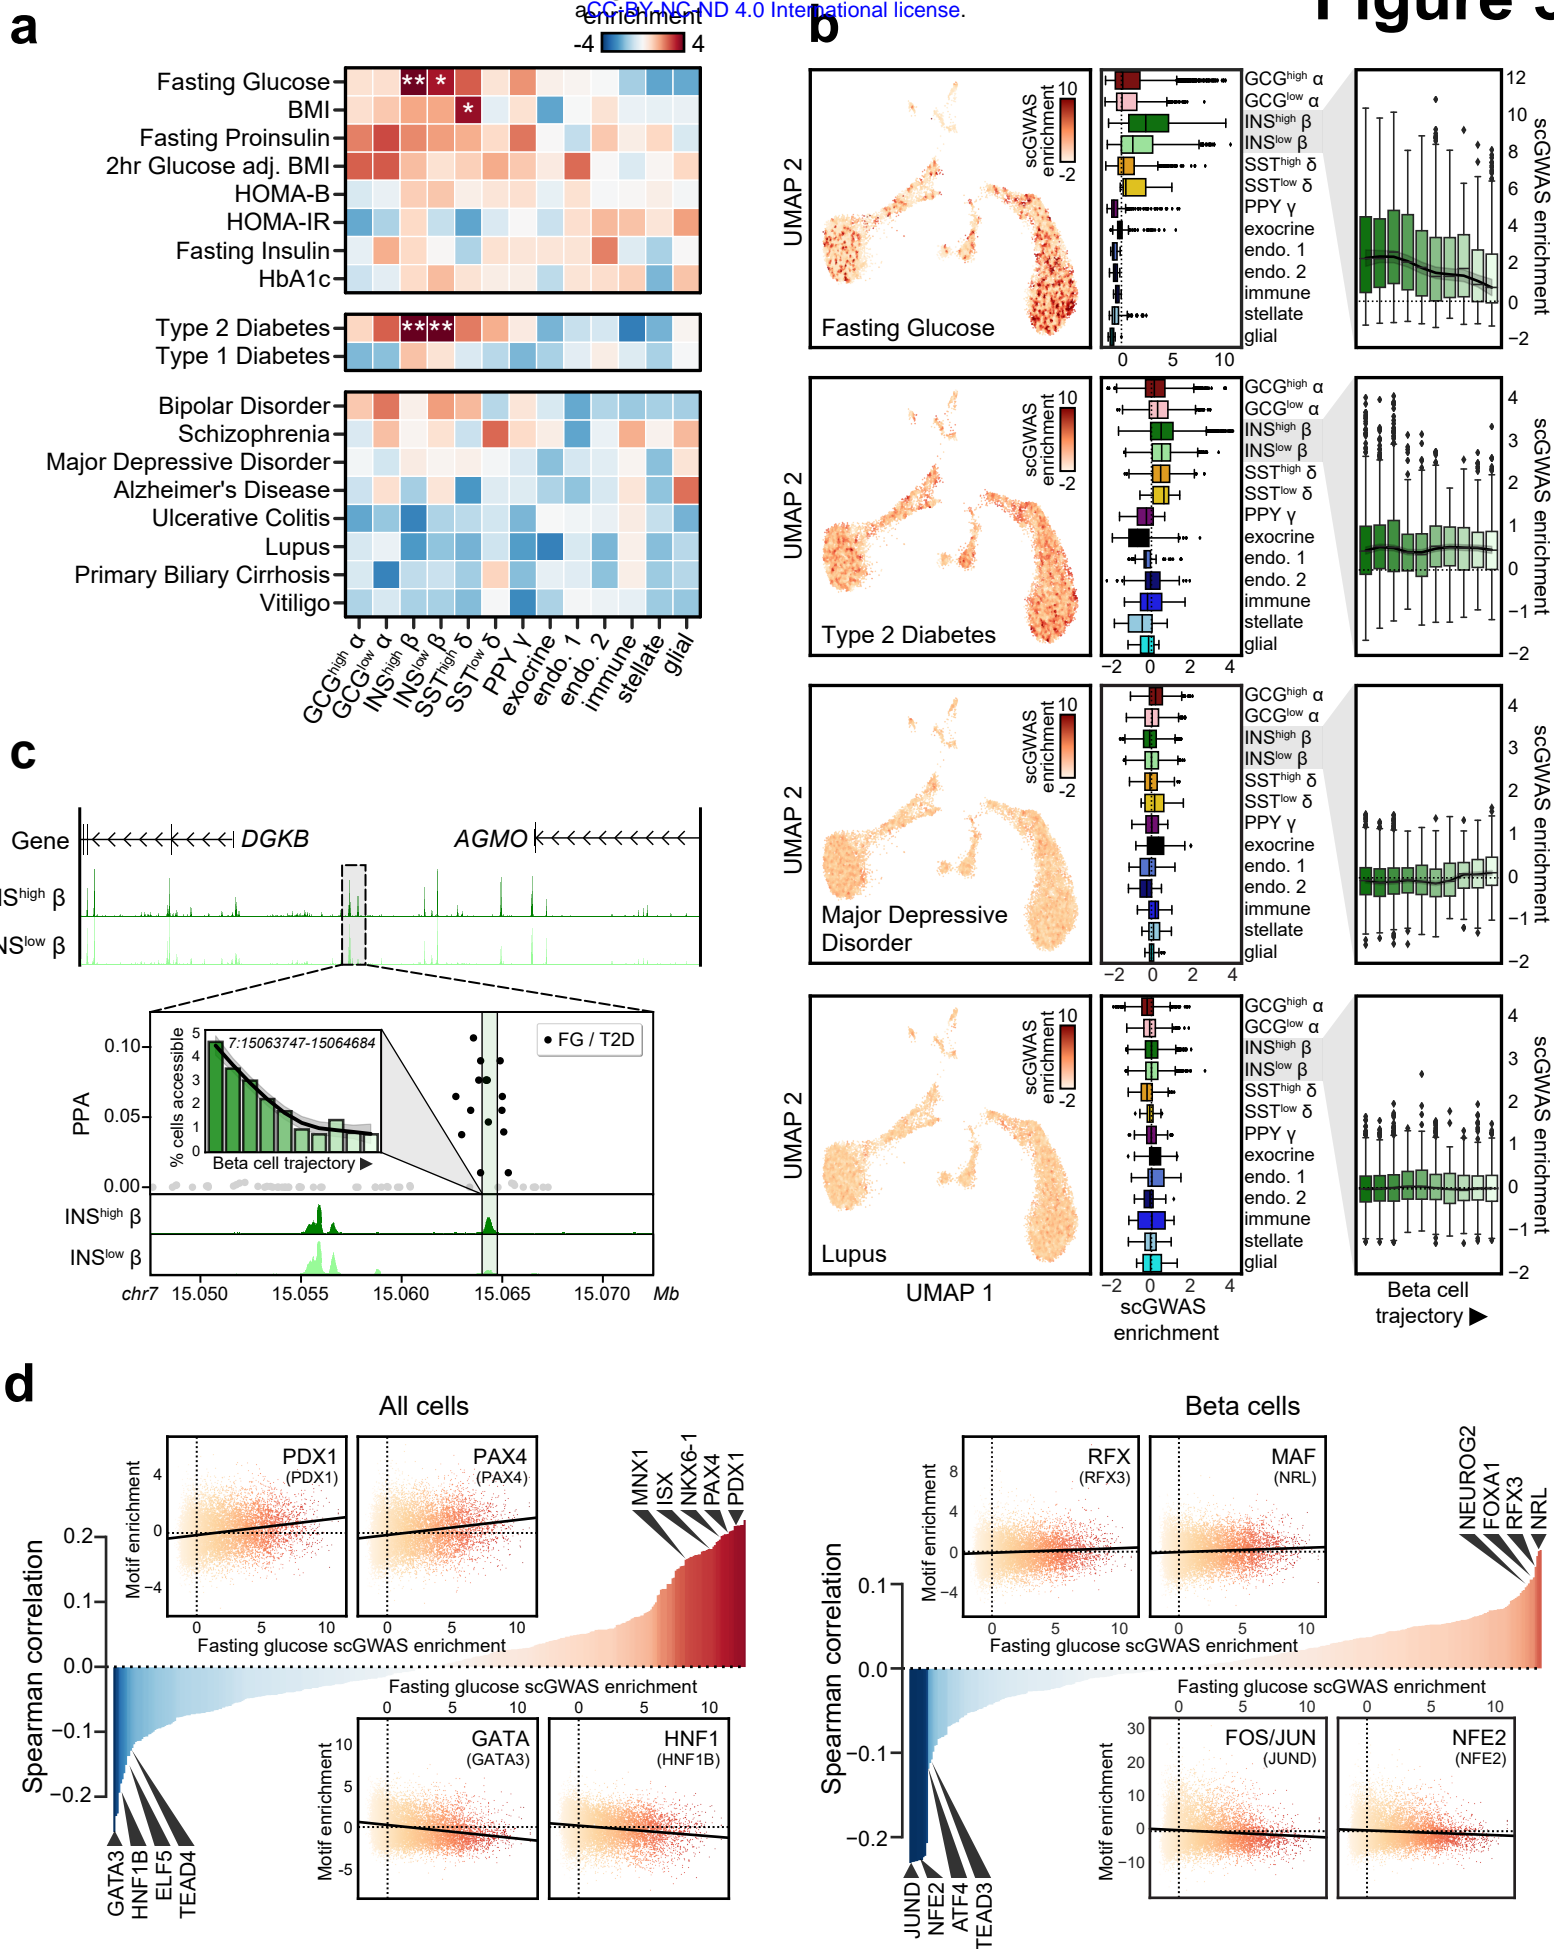

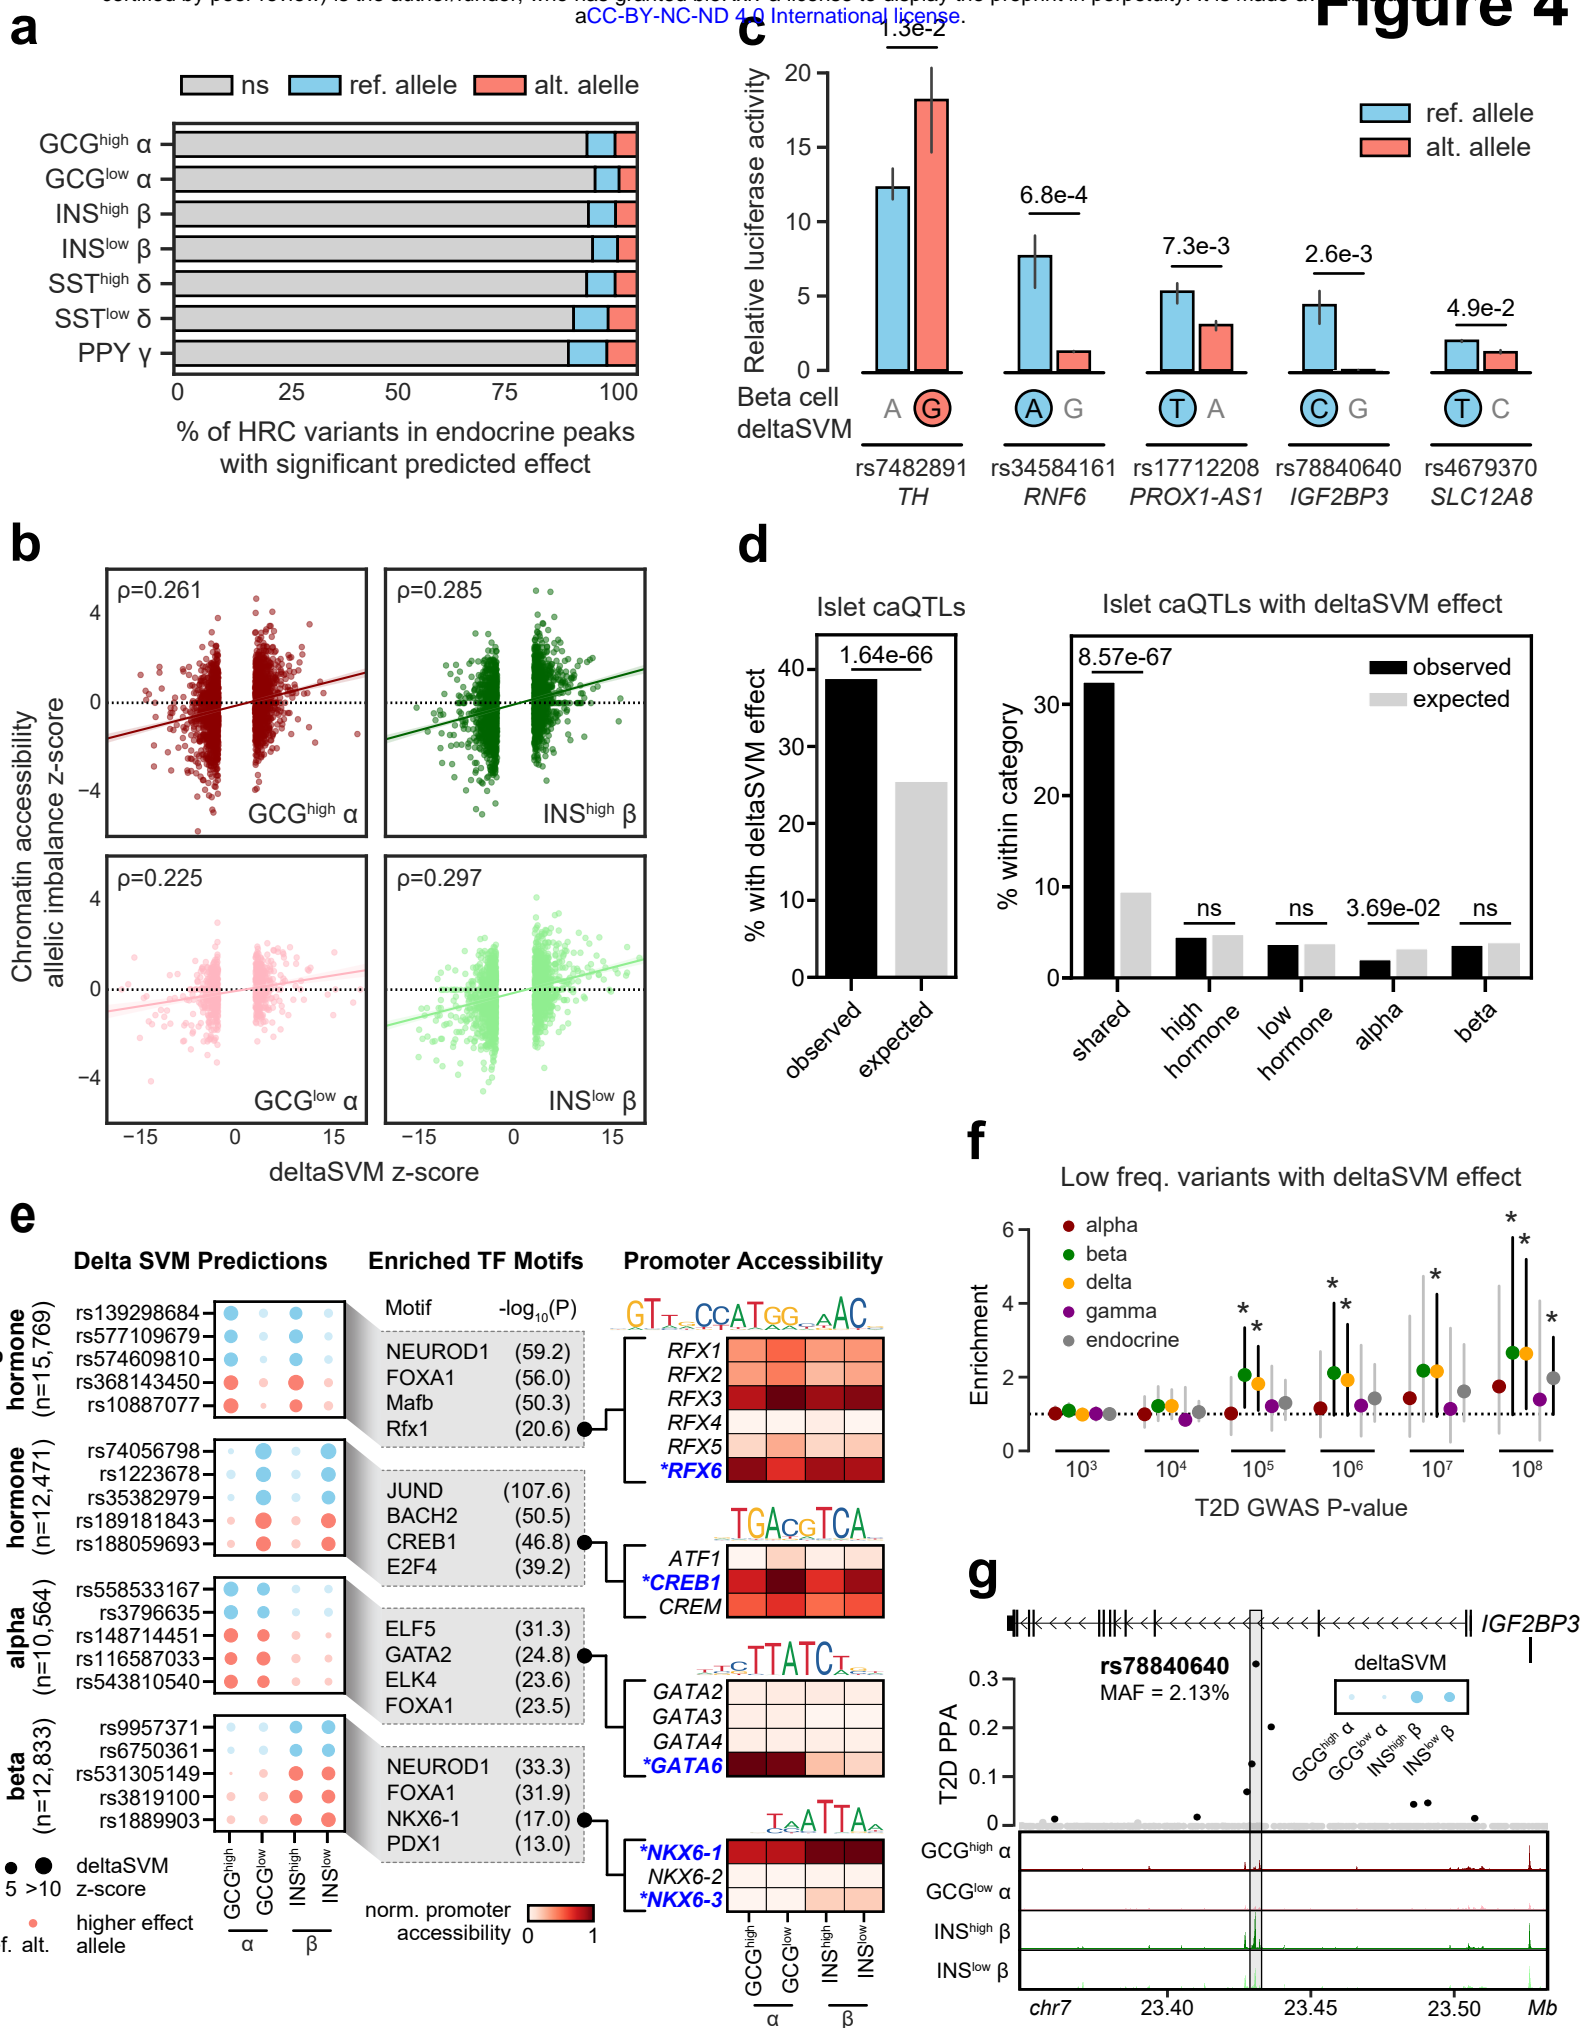

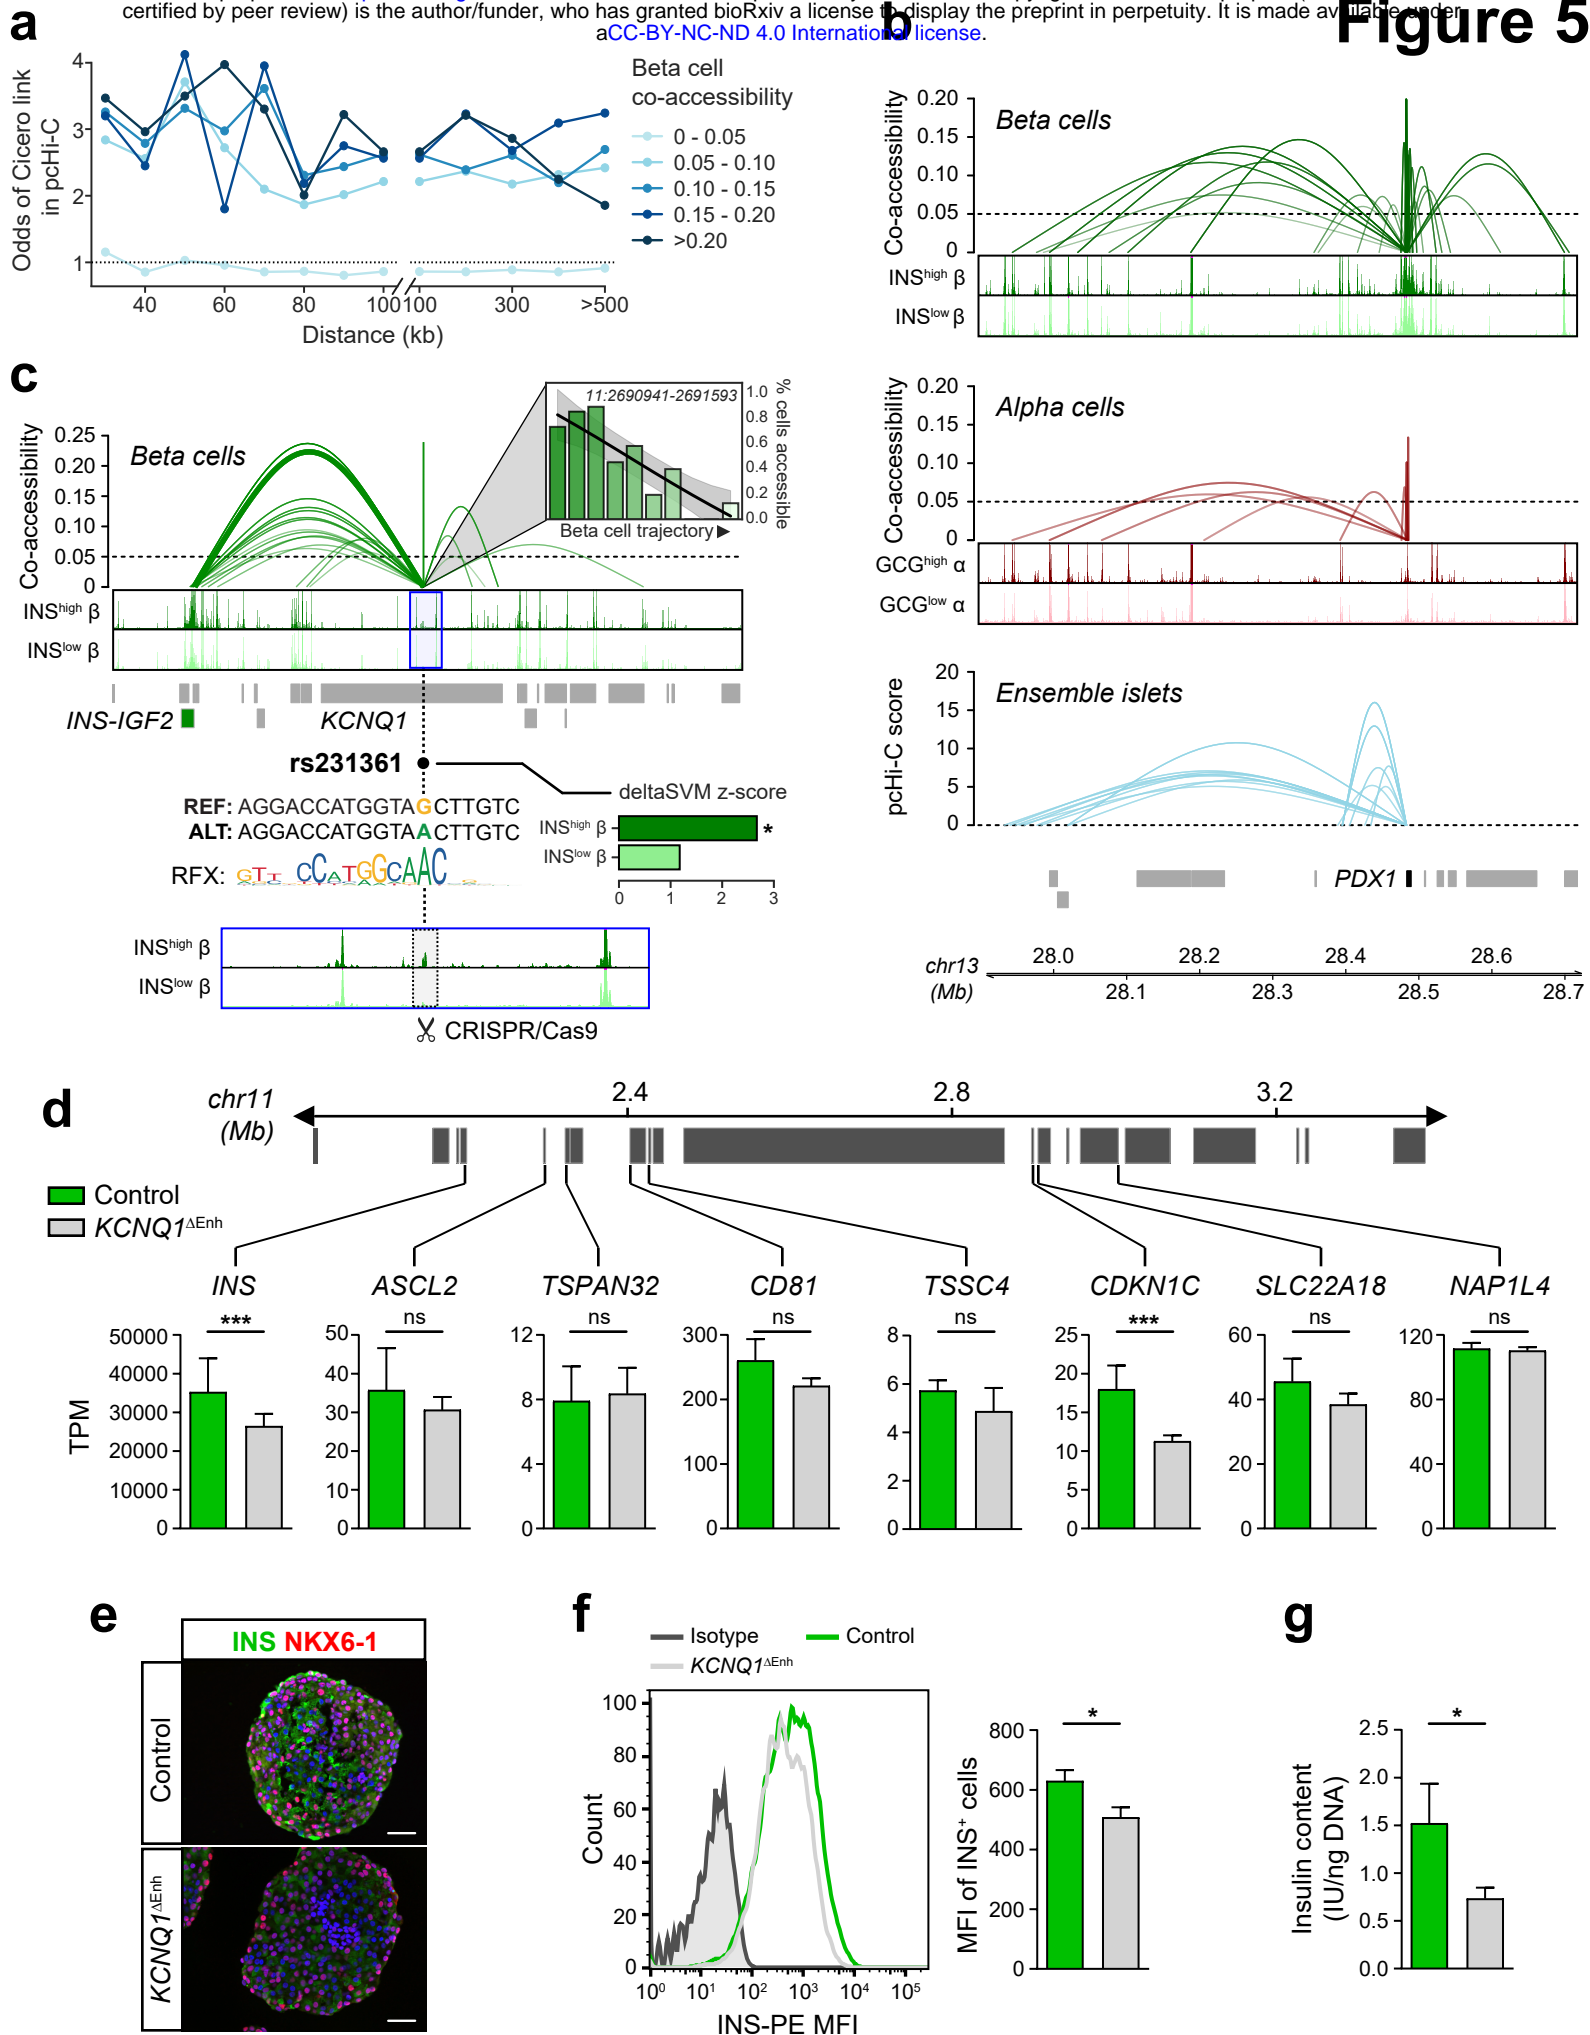

Source: https://www.biorxiv.org/content/10.1101/693671v1.full.pdf
